1 **Ophiuroid phylotranscriptomics enables discovery of novel echinoderm representatives**  
2 **of bilaterian neuropeptide families and reconstruction of neuropeptide precursor**  
3 **evolution over ~270 million years.**

4

5 Meet Zandawala<sup>1,2,\*</sup>, Ismail Moghul<sup>1,#</sup>, Luis Alfonso Yañez Guerra<sup>1,#</sup>, Jérôme Delroisse<sup>1,#</sup>,  
6 Nikara Abylkassimova<sup>1</sup>, Andrew F. Hugall<sup>3</sup>, Timothy D. O’Hara<sup>3</sup> and Maurice R. Elphick<sup>1,\*</sup>

7

8 Meet Zandawala: [meet.zandawala@zoologi.su.se](mailto:meet.zandawala@zoologi.su.se)

9 Ismail Moghul: [muhammad.moghul.16@ucl.ac.uk](mailto:muhammad.moghul.16@ucl.ac.uk)

10 Luis Alfonso Yañez Guerra: [l.a.yanezguerra@qmul.ac.uk](mailto:l.a.yanezguerra@qmul.ac.uk)

11 Jérôme Delroisse: [jerome.delroisse@umons.ac.be](mailto:jerome.delroisse@umons.ac.be)

12 Nikara Abylkassimova: [abylkassimova@gmail.com](mailto:abylkassimova@gmail.com)

13 Andrew F. Hugall: [ahugall@museum.vic.gov.au](mailto:ahugall@museum.vic.gov.au)

14 Timothy D. O’Hara: [tohara@museum.vic.gov.au](mailto:tohara@museum.vic.gov.au)

15 Maurice R. Elphick: [m.r.elphick@qmul.ac.uk](mailto:m.r.elphick@qmul.ac.uk)

16

17 1. Queen Mary University of London, School of Biological & Chemical Sciences, Mile End  
18 Road, London, E1 4NS, UK

19 2. Present address: Stockholm University, Department of Zoology, Stockholm, Sweden

20 3. Museums Victoria, GPO Box 666, Melbourne, VIC 3001, Australia

21

22 # Contributed equally

23 \* Correspondence to: Prof. M.R. Elphick and Dr. M. Zandawala

24 Tel: 44 207 882 6664

25 Fax: 44 208 983 0973

26 E-mail: [m.r.elphick@qmul.ac.uk](mailto:m.r.elphick@qmul.ac.uk) and [meet.zandawala@zoologi.su.se](mailto:meet.zandawala@zoologi.su.se)

27 **Abstract**

28 **Background:**

29         Neuropeptides are a diverse class of intercellular signaling molecules that mediate  
30 neuronal regulation of many physiological and behavioural processes, including feeding,  
31 reproduction and locomotion. Recent advances in genome/transcriptome sequencing are  
32 enabling identification of neuropeptide precursor proteins in species from a growing variety  
33 of animal taxa, providing new insights into the evolution of neuropeptide signaling. Here we  
34 report a phylo-transcriptomic analysis of neuropeptide precursors in over fifty species of  
35 brittle stars (Class Ophiuroidea; Phylum Echinodermata).

36

37 **Results:**

38         Detailed analysis of transcriptome sequence data from three brittle star species,  
39 *Ophionotus victoriae*, *Amphiura filiformis* and *Ophiopsila aranea*, enabled the first  
40 comprehensive identification of neuropeptide precursors in ophiuroids. Representatives of  
41 over thirty bilaterian neuropeptide precursor families were identified, some of which occur as  
42 paralogs (*e.g.* thyrotropin-releasing hormone, corticotropin-releasing hormone,  
43 cholecystokinin, somatostatin and pedal peptide). Furthermore, homologs of  
44 endothelin/CCHamide, eclosion hormone, neuropeptide-F/Y and nucleobinin/nesfatin were  
45 discovered here in a deuterostome/echinoderm for the first time. The majority of ophiuroid  
46 neuropeptide precursors contain a single copy of a neuropeptide, but several precursors  
47 comprise multiple copies of identical or non-identical, but structurally-related, neuropeptides.  
48 Here we performed an unprecedented investigation of the evolution of neuropeptide copy-  
49 number over a period of ~270 million years by analysing sequence data from over fifty  
50 ophiuroid species, with reference to a robust phylogeny. Interestingly, the number of  
51 neuropeptide copies in the majority of precursors was constant across all the species  
52 examined, but examples of clade-specific losses/gains of neuropeptides were also observed.

53

54 **Conclusions:**

55         We report here the most comprehensive analysis to date of neuropeptide precursors in  
56 the phylum Echinodermata, with novel representatives of several bilaterian neuropeptide  
57 families discovered for the first time in echinoderms. Furthermore, analysis of precursor  
58 proteins comprising multiple copies of identical or related neuropeptides across ~270 million  
59 years of ophiuroid evolution indicates that the composition of neuropeptide “cocktails” is  
60 functionally important, but with plasticity over long evolutionary time scales.

61

62 **Keywords (3 to 10):**

63 Neuropeptide; echinoderm; Ophiuroidea; eclosion hormone; CCHamide; neuropeptide-Y;

64 evolution

65

## 66 **Introduction**

67           The nervous systems of animals utilize a wide variety of chemicals for neuronal  
68 communication. These include amino acids (*e.g.* glutamate), biogenic amines (*e.g.* serotonin),  
69 and neuropeptides (*e.g.* vasopressin) amongst others. Neuropeptides are by far the most-  
70 diverse and they control many physiological/behavioural processes, including feeding,  
71 reproduction and locomotion [1-3]. Recent advances in genome/transcriptome sequencing are  
72 enabling identification of neuropeptide precursor proteins in species from a growing variety  
73 of animal taxa, providing new insights into the evolution of neuropeptide signaling [4-8]. The  
74 echinoderms are notable in this regard because as deuterostomian invertebrates they occupy  
75 an “intermediate” phylogenetic position with respect to the vertebrates and intensely studied  
76 protostomian invertebrates such as insects (*e.g. Drosophila melanogaster*) and nematodes  
77 (*e.g. Caenorhabditis elegans*). Accordingly, characterisation of neuropeptide signaling  
78 systems in echinoderms has recently provided key “missing links” for determination of  
79 neuropeptide relationships and reconstruction of neuropeptide evolution [8-10].

80           The phylum Echinodermata comprises five extant classes: Echinoidea (sea urchins  
81 and sand dollars), Holothuroidea (sea cucumbers), Asteroidea (starfish), Ophiuroidea (brittle  
82 stars and basket stars) and Crinoidea (sea lilies and feather stars). Recent molecular  
83 phylogenetic studies support the hypothesis that Echinoidea and Holothuroidea are sister  
84 groups (Echinozoa) and Asteroidea and Ophiuroidea are sister groups (Asterozoa), with the  
85 Crinoidea basal to the Echinozoa + Asterozoa clade (Eleutherozoa) [11, 12]. Echinoderms  
86 are marine organisms that have several unique features including pentaradial symmetry as  
87 adults, a remarkable ability to autotomise and regenerate body parts, and neurally-controlled  
88 mutable collagenous tissue [13, 14]. Previous transcriptomic analyses have identified  
89 neuropeptide precursor complements in *Strongylocentrotus purpuratus* (purple sea urchin),  
90 *Apostichopus japonicus* (Japanese sea cucumber) and *Asterias rubens* (common European  
91 starfish) [8, 15, 16]. Furthermore, the identification of neuropeptides in these species has  
92 facilitated investigation of the evolution and physiological roles of various neuropeptide  
93 signaling systems [8-10, 17-21].

94           The recent progress in transcriptomic/genomic characterization of echinoderm  
95 neuropeptide systems has hitherto not been extended to ophiuroids or crinoids. The  
96 Ophiuroidea constitutes the largest class among extant echinoderms [22] with a long  
97 evolutionary history that extends back to the early Ordovician (around 480 million years ago)  
98 [23], whilst extant families date from the mid-Permian (~ 270 million years ago) [12].  
99 Available molecular data for ophiuroids has increased significantly in recent years with the  
100 emergence of numerous transcriptomic studies [20, 24-29]. Here, we utilize transcriptome

101 sequence data from three brittle star species, *Ophionotus victoriae*, *Amphiura filiformis* and  
102 *Ophiopsila aranea* to perform the first comprehensive identification of neuropeptide  
103 precursors in ophiuroids. We identify representatives of over thirty neuropeptide families  
104 including homologs of endothelin/CCHamide, eclosion hormone (EH), neuropeptide-F/Y  
105 (NPF/NPY) and nucleobinin (NUCB)/nesfatin, which are the first to be discovered in a  
106 deuterostome/echinoderm.

107

108 Transcriptomes have also been employed to investigate the phylogenetic relationships  
109 of the ophiuroids, utilising data from fifty-two species [12]. In this the most comprehensive  
110 molecular analysis of ophiuroid phylogeny to date, previous morphology-based classification  
111 schemes [30] were rejected in favour of a new phylogeny comprising three primary ophiuroid  
112 clades [12, 31, 32]. This landmark study and the associated large dataset has provided a  
113 unique opportunity to investigate the conservation and diversification of neuropeptide  
114 precursor structure over a period of ~270 million years of ophiuroid evolution. Our analysis  
115 reveals that the majority of ophiuroid neuropeptide precursors contain a single copy of a  
116 neuropeptide, but several precursors comprise multiple copies of identical or non-identical,  
117 but structurally-related, neuropeptides. Interestingly, the number of neuropeptide copies in  
118 the majority of precursors is constant across all the ophiuroid species examined, but examples  
119 of clade-specific losses/gains of neuropeptides are also observed. This remarkable  
120 conservation in neuropeptide copy number across ~270 million years of ophiuroid evolution  
121 indicates that the composition of neuropeptide “cocktails” is functionally important, but with  
122 plasticity over long evolutionary time scales.

## 123 **Results and discussion**

124 Here we have identified ophiuroid homologs of neuropeptide precursors that have  
125 been identified previously in other echinoderms and these include, alphabetically: AN  
126 peptides, bursicon ( $\alpha$  and  $\beta$ ), calcitonin, cholecystokinin (CCK), corazonin, corticotropin-  
127 releasing hormone (CRH), glycoprotein hormones ( $\alpha 2$  and  $\beta 5$ ), gonadotropin-releasing  
128 hormone (GnRH), insulin-like peptide (ILP), kisspeptin (KP), luqin, melanin-concentrating  
129 hormone (MCH), NG peptides (neuropeptide-S), orexin, pedal peptides, pigment-dispersing  
130 factor (PDF), relaxin-like peptide, SALMFamides (L-type and F-type), somatostatin,  
131 tachykinin, thyrotropin-releasing hormone (TRH) and vasopressin/oxytocin. Identification of  
132 ophiuroid representatives of these neuropeptide precursor types has in some cases provided  
133 new insights into neuropeptide precursor structure and evolution, as discussed in more detail  
134 below. First, however, we will highlight representatives of bilaterian neuropeptide precursor  
135 families that have been identified here for the first time in an echinoderm species.

136

### 137 ***Discovery of the first echinoderm representatives of bilaterian neuropeptide families***

138 Comprehensive analysis of transcriptome sequence data from three ophiuroid species,  
139 *O. victoriae*, *A. filiformis* and *O. aranea*, has enabled the discovery of the first echinoderm  
140 representatives of four bilaterian neuropeptide families. Specifically, we have discovered the  
141 first deuterostomian homologs of eclosion hormone (**Figure 2**), the first ambulacrarian  
142 homolog of CCHamide/endothelin-type peptides (**Figure 3A**), and the first echinoderm  
143 homologs of neuropeptide-Y/neuropeptide-F (**Figure 3B**) and NUCB/nesfatin (**Figure S1**),  
144 as discussed in detail below.

145

### 146 **Eclosion hormone**

147 Eclosion hormone (EH) was first isolated and sequenced in the insects *Manduca sexta*  
148 (tobacco hornworm) and *Bombyx mori* (silk moth) and shown to alter the timing of adult  
149 emergence [33, 34]. EH is one of the main peptide/protein hormones involved in control of  
150 ecdysis (*i.e.* shedding of the cuticle) behavior in insects [35]. It binds to and activates a  
151 receptor guanylyl cyclase that is expressed in epitracheal Inka cells and causes the secondary  
152 release of ecdysis-triggering hormone (ETH) that is also expressed in Inka cells [36, 37]. In  
153 *Drosophila*, EH is important but not essential for ecdysis as some flies lacking EH are able to  
154 undergo ecdysis [38]. Insect EHs have six conserved cysteine residues that form three  
155 disulfide bridges [36]. EHs have not been discovered previously outside of arthropods.  
156 Interestingly, four EH-like precursors were identified in *A. filiformis* and *O. aranea* and two  
157 in *O. victoriae* (**Figure S2-S4**). The ophiuroid EH-like precursors are orthologous to

158 neuropeptide precursors previously identified in the sea-urchin *S. purpuratus* (Spnp11 and  
159 Spnp15, which we now rename as Spur EH1 and Spur EH2, respectively) [16] and the  
160 starfish *A. rubens* (Arnp11, Arnp15 and Arnp15b renamed as Arub EH1, Arub EH2a and  
161 Arub EH2b, respectively) [8]. The positions of cysteine residues are conserved across all  
162 echinoderm and insect EHs, but aside from this there is little sequence conservation (**Figure**  
163 **2A**). The echinoderm EH-like precursor sequences were also analysed using a sequence-  
164 similarity-based clustering approach based on BLASTp e-values using CLANS software  
165 [39]. The analysis shows that echinoderm EH-like precursors (i) cluster in two compact  
166 subgroups (echinoderm EH-like precursor 1 and EH-like precursor 2 and (ii) have strong  
167 positive BLAST results with arthropod EHs and, to a lesser extent, with arthropod ion  
168 transport peptide (ITP) and vertebrate atrial natriuretic peptide (ANP) (**Figure 2B**). ITP  
169 precursors also possess six cysteine residues; however, the position of these residues is not  
170 conserved with cysteine residues found in echinoderm EH-like precursors (not shown).

171 To obtain further evidence for the presence of an EH-like signaling system in  
172 echinoderms, we performed a phylogenetic analysis of EH-type receptors. Insect EHs  
173 mediate their effects by binding to membrane guanylyl cyclase receptors [37]. EH receptors  
174 are closely related to vertebrate ANP receptors and various orphan receptors [40]. Specific  
175 BLAST searches enabled identification of transcripts in *O. victoriae*, *A. filiformis* and *O.*  
176 *aranea* that encode proteins similar to arthropod EH receptors. Maximum likelihood and  
177 Bayesian phylogenetic analyses confirmed that these sequences group with the receptor  
178 cluster containing EH receptors (**Figure 2C**). The discovery of the first deuterostomian EHs  
179 suggests an ancient bilaterian origin of EHs and indicates that these hormones may have other  
180 functions in invertebrates aside from their role in ecdysis.

181

## 182 CCHamide

183 CCHamides are neuropeptides that were discovered relatively recently in the  
184 silkworm *Bombyx mori* [41]. Later, it was found that insects have two CCHamide genes,  
185 CCHamide-1 and CCHamide-2, each encoding a single copy of the mature peptide [42].  
186 These peptides are referred to as CCHamides because they contain two cysteine residues and  
187 a characteristic histidine-amide C-terminal motif. There are two CCHamide receptors in  
188 insects: CCHamide-1 specifically activates one receptor and CCHamide-2 specifically  
189 activates the second receptor [42, 43]. CCHamide-1 has a physiological a role in starvation-  
190 induced olfactory modifications [44] whereas as CCHamide-2 regulates feeding, growth and  
191 developmental timing in flies [43, 45]. Recent studies examining the evolution of  
192 neuropeptides in the Bilateria have shown that protostomian CCHamides are related to

193 elevenin (another protostomian neuropeptide originally discovered from the mollusc *Aplysia*  
194 *californica* L11 neuron), lophotrochozoan GGNG peptides, endothelins and gastrin-releasing  
195 peptides (GRPs) [6, 7, 46, 47]. The latter two are neuropeptide types that have not been found  
196 outside chordates. Furthermore, the degree of sequence/structural conservation varies across  
197 these different peptide families. Hence, CCHamides are amidated and have a disulphide  
198 bridge, elevenins and endothelins have a disulphide bridge but are non-amidated and GRPs  
199 are amidated but lack the disulphide bridge. Furthermore, CCHamide-1 is located  
200 immediately after the signal peptide whereas there is a dibasic cleavage site separating the  
201 signal peptide and CCHamide-2 [42].

202 Here we have identified two neuropeptide precursors in brittle stars whose sequence  
203 and precursor structure resembles those of lophotrochozoan GGNG peptides and insect  
204 CCHamide-1 (**Figure 3A**). The CCHamide-like precursor 1 identified in *O. victoriae* is  
205 orthologous to an uncharacterized neuropeptide precursor (Arnp25) identified previously in  
206 the starfish *A. rubens* [8], whereas the CCHamide-like precursor 2 was only found in brittle  
207 stars. Both CCHamide-like precursors in *O. victoriae* comprise a single copy of a putative  
208 cyclic amidated peptide that is flanked by a signal peptide at the N-terminus and a dibasic  
209 cleavage site at the C-terminus. Interestingly, both of these peptides lack a penultimate  
210 histidine residue, just like the lophotrochozoan GGNG peptides (**Figure 3A**) [46, 47].

211

#### 212 Neuropeptide-Y/Neuropeptide-F

213 Neuropeptide-Y (NPY) was first isolated and sequenced from the porcine  
214 hypothalamus in 1982 [48, 49]. Although the NPY/NPF family of peptides are pleiotropic in  
215 nature [50], they are mainly known for their roles in regulation of feeding and stress [3, 51,  
216 52]. The discovery of Neuropeptide-F (NPF) in the tapeworm *Moniezia expansa* in 1991  
217 demonstrated for the first time the occurrence of NPY homologs in invertebrates [53]. Here,  
218 we have identified the first echinoderm representatives of the NPY/NPF family in brittle stars  
219 and starfish (**Figure 3B**). The brittle star precursors contain a peptide with a C-terminal  
220 RYamide, in common with NPY in vertebrates and an ortholog in the starfish *Patiria*  
221 *miniata*. In contrast, an ortholog in the starfish *A. rubens* has a C-terminal RFamide, a feature  
222 that it shares with NPY/NPF-type peptides in the hemichordate *S. kowalevskii* and in  
223 protostomes. Thus, our findings have revealed that NPY/NPF-type peptides with a C-terminal  
224 Yamide motif are not restricted to vertebrates. Echinoderm NPY/NPF-type peptides are  
225 located immediately after the signal peptide in the precursor proteins, as is the case in other  
226 bilaterian species. Surprisingly, we did not find NPY/NPF-type precursors in the sea urchin *S.*  
227 *purpuratus* or the sea cucumber *A. japonicus*. However, we suspect that this may reflect



228 sequence divergence rather than gene loss because a gene encoding a NPY/NPF-type receptor  
229 can be found in the *S. purpuratus* genome [54].

230

### 231 NUCB

232 Nucleobindins (NUCB1 and NUCB2) are multidomain Ca<sup>2+</sup> and DNA binding  
233 proteins. NUCB1 was first discovered in 1992 and thought to play a role in apoptosis and  
234 autoimmunity [55]. Interestingly, the NUCB1 precursor has both a signal peptide and a  
235 leucine zipper structure suggesting that it can bind DNA and act as an endocrine factor [56].  
236 NUCB2 is a homolog of NUCB1 and was named based on high sequence similarity between  
237 the two precursors [57]. In 2006, an 82 amino acid peptide located in the N-terminal region of  
238 NUCB2 was reported. This peptide, Nesfatin-1 (Nucleobindin-2-Encoded Satiety and FAT-  
239 Influencing protein-1), was discovered as a satiety inducing factor in the rat hypothalamus  
240 [58]. Its role in inhibiting food intake in vertebrates is now well-established [57, 59].  
241 Moreover, this pleiotropic peptide also modulates other processes including glucose and lipid  
242 metabolism, and cardiovascular and reproductive functions. Recently, nesfatin-1-like peptide  
243 derived from NUCB1 was shown to be anorexigenic in goldfish [60]. Surprisingly, the  
244 presence of NUCBs in invertebrates had not been reported, in spite of the potential  
245 therapeutic applications of these molecules in obesity related disorders. Here, we show that  
246 NUCB-type precursors are present in echinoderms (**Figure S1A**). Phylogenetic analysis of  
247 NUCB precursors reveals that a single copy of the NUCB precursor is found in invertebrate  
248 species and gene duplication in the vertebrate lineage gave rise to NUCB1 and NUCB2  
249 (**Figure S1B**). In chordates, the NUCB precursors are predicted to generate three peptides  
250 (Nesfatin-1, 2 and 3); however, no biological role has been attributed specifically to nesfatin-  
251 2 and nesfatin-3. Interestingly, the prohormone convertase cleavage sites expected to  
252 generate Nesfatin-1, 2 and 3 are conserved between echinoderm and chordate NUCBs.  
253 Moreover, the *O. victoriae* precursor has an additional predicted cleavage site within the  
254 Nesfatin-1 containing region, which is not present in other species (except for *Drosophila*  
255 *melanogaster*). However, it remains to be determined whether or not this cleavage site in the  
256 *O. victoriae* precursor is functional.

257

### 258 ***First comprehensive identification of neuropeptide precursors in ophiuroids***

259 We have identified neuropeptide precursors belonging to 32 families, which  
260 represents the first comprehensive analysis of neuropeptide precursors in ophiuroids (**Figure**  
261 **4; Figure S2-S4**). Several of these neuropeptide families have been identified previously in  
262 echinoderms and include homologs of AN peptides, bursicon ( $\alpha$  and  $\beta$ ), calcitonin, CCK

263 [15], corazonin [10], CRH, glycoprotein hormones ( $\alpha 2$  and  $\beta 5$ ) [61], GnRH [10], ILP [61],  
264 KP [8], luqin [7], MCH [8], NG peptides (neuropeptide-S) [9, 62], orexin [6, 8], pedal  
265 peptides [16], PDF [8], relaxin-like peptide [63], SALMFamides (L-type and F-type) [19, 20,  
266 64], somatostatin [8], tachykinin [8], TRH [16] and vasopressin/oxytocin [61, 62] (**Figures 5-**  
267 **7 and S5-S9**). With the exception of MCH (which may be unique to deuterostomes) [6, 8],  
268 AN peptides and SALMFamides (which thus far have only been identified in echinoderms),  
269 the origins of all of the neuropeptide precursors identified here in ophiuroids predate the  
270 divergence of protostomes and deuterostomes [6, 7]. Of the three species examined here, the  
271 neuropeptide precursor complement of *O. victoriae* was the most complete (**Figure 4**) and  
272 therefore this species is used as a representative ophiuroid for sequence alignments, except in  
273 a few cases where a neuropeptide precursor was not found in *O. victoriae*. Below we  
274 highlight several interesting and/or unusual features of ophiuroid neuropeptides and  
275 neuropeptide precursors.

276

#### 277 *Neuropeptide precursors that occur in multiple forms in O. victoriae*

278

##### 279 Thyrotropin-releasing hormone (TRH)-type precursors

280 TRH (also known as thyrotropin-releasing factor or thyroliberin) was first isolated and  
281 sequenced in the 1960s [65-67]. In mammals, TRH is produced in the hypothalamus and  
282 stimulates the release of thyroid-stimulating hormone (TSH) and prolactin from the anterior  
283 pituitary [68, 69]. The recent discovery of a TRH receptor in the annelid *Platynereis*  
284 *dumerilii* indicates that the evolutionary origin of this neuropeptide signaling system predates  
285 the divergence of protostomes and deuterostomes [70].

286 The human TRH precursor contains six copies of the tripeptide pQHPamide [71].  
287 Precursor proteins comprising multiple copies of TRH-like peptides have been identified  
288 previously in the sea urchin *S. purpuratus*, the sea cucumber *A. japonicus* and the starfish *A.*  
289 *rubens* [8, 15, 16], with a single TRH-type precursor found in each of these species.  
290 Interestingly, here we identified two TRH-type precursors (OvTRHP1 and OvTRHP2) in *O.*  
291 *victoriae* (**Figure S2 and 6A**). OvTRHP1 comprises 21 copies of putative TRH-like  
292 tetrapeptides with the motif pQXXXamide (where X is variable). OvTRHP2, on the other  
293 hand, comprises two copies of the putative tetrapeptide pQGPRamide and two longer  
294 peptides that also have a C-terminal GPRamide motif but lack the N-terminal pyroglutamate.

295

##### 296 Cholecystokinin (CCK)-type precursors

297 A CCK-type peptide (formerly pancreozymin) was first sequenced in the 1960s [72].  
298 CCK-type peptides play numerous roles in feeding and digestion related physiology. CCK  
299 mediates satiety, stimulates the release of digestive enzymes and gall bladder contractions  
300 [73-75]. CCK-type peptides are involved in mechanisms of learning and memory, and  
301 analgesia [76]. A neuropeptide precursor comprising two CCK-like peptides was recently  
302 identified in the starfish *A. rubens* [8]. Here we have identified two CCK-type precursors in  
303 *O. victoriae* (OvCCKP1 and OvCCKP2) and orthologs of both of these precursors were also  
304 identified in the sea urchin *S. purpuratus* (Figure S2) [16]. The CCK-type precursor 1  
305 comprises three CCK-like peptides in both *O. victoriae* and *S. purpuratus* and this precursor  
306 is similar to the *A. rubens* CCK-type precursor, which comprises two CCK-like peptides. In  
307 contrast, the CCK-type precursor 2 comprises a single CCK-like peptide in both *O. victoriae*  
308 and *S. purpuratus*. Interestingly, the sequence of the *S. purpuratus* CCK-type precursor 2 was  
309 reported previously as part of a genome-wide search for neuropeptides [77], but the authors  
310 of this study did not identify it as a CCK-type precursor. However, based on the presence of a  
311 conserved tyrosine residue and a C-terminal F-amide motif in the predicted neuropeptide  
312 derived from this protein, it is evident that it belongs to the family of CCK-type precursors  
313 (Figure 6B). A search of a preliminary genome assembly of the starfish *Patiria miniata*  
314 (<http://www.echinobase.org>) [78] did not reveal a gene encoding a CCK-type precursor 2.  
315 Therefore, it appears that this neuropeptide precursor type may have been lost in the  
316 Asteroidea; nevertheless, further analysis of a wider range of starfish species will be required  
317 to draw definitive conclusions. With a broader evolutionary perspective, CCK-type peptides  
318 in deuterostomes are orthologs of sulfakinin (SK)-type neuropeptides found in insects [6, 7].  
319 Interestingly, insects have a single SK precursor, which comprises two neuropeptides, SK-1  
320 and SK-2 [79], and this may reflect the ancestral condition in the common ancestor of  
321 protostomes and deuterostomes. Thus, the occurrence of two CCK-type peptides on a single  
322 precursor in *A. rubens* and insects may be an ancestral characteristic and the occurrence of  
323 two CCK-type precursors that comprise one and three CCK-type peptides appears to be a  
324 derived characteristic.

325

### 326 Somatostatin-type precursors

327 Somatostatin was first isolated and sequenced from sheep hypothalamus in 1973 [80].  
328 This peptide inhibits the release of pituitary hormones such as growth hormone, prolactin and  
329 thyroid-stimulating hormone [81]. Moreover, it also inhibits the release of gastrointestinal  
330 (cholecystokinin and gastrin amongst others) and pancreatic (insulin and glucagon) hormones  
331 [82-84]. Aside from its effects on release of hormones, somatostatin also has central actions

332 that influence motor activity [82]. Here, we have identified two somatostatin-type precursors  
333 (OvSSP-1 and OvSSP-2) in *O. victoriae*. (**Figure S2 and 6C**). Homologs of both of these  
334 precursors are present in the sea urchin *S. purpuratus* (**Figure S2 and 6C**), one of which was  
335 previously referred to as Spnp16 [16]. By comparison, only a single somatostatin-type  
336 precursor has been found in the starfish *A. rubens*, which is an ortholog of OvSSP-1 [8]. All  
337 somatostatin-type precursors comprise a single copy of the bioactive neuropeptide, which is  
338 located in the C-terminal region of the precursor [85, 86]. Interestingly, the type-1  
339 somatostatins in echinoderms have a phenylalanine residue located in the middle part of the  
340 peptide and this conserved feature is found in human somatostatin. Conversely, type-2  
341 somatostatins in echinoderms lack the phenylalanine residue but have a neighbouring  
342 tryptophan-lysine (WK) motif that is also conserved in human and *B. floridae* somatostatins  
343 (**Figure 6C**). The deuterostomian somatostatins are orthologous to the allatostatin-C  
344 neuropeptide family in arthropods [7]. This family of peptides comprises three precursor-  
345 types: allatostatin-C, allatostatin-CC and the recently discovered allatostatin-CCC [86, 87].  
346 Both allatostatin-C and allatostatin-CC are non-amidated, like somatostatins; however,  
347 allatostatin-CCC has a C-terminal amide. Hence, non-amidated peptides may be  
348 representative of the ancestral condition in the common ancestor of protostomes and  
349 deuterostomes, with the amidated allatostatin-CCC probably having evolved only within the  
350 arthropod lineage [87]. It remains to be determined whether or not the duplication of  
351 somatostatin-type precursors in echinoderms and the duplication of allatostatin C (to give rise  
352 to allatostatin-CC) represent independent duplications. Further insights into this issue may be  
353 obtained if the receptors for somatostatin-type peptides in echinoderms are deorphanised.

354

### 355 Corticotropin-releasing hormone (CRH)-type precursors

356 CRH-type peptides are a family of related neuropeptides that include CRH, urocortins  
357 and urotensin-I in chordates, egg-laying hormone (ELH) in lophotrochozoans and diuretic  
358 hormone 44 (DH<sub>44</sub>) in arthropods [6, 7]. Arthropods usually have a single DH<sub>44</sub> precursor,  
359 which comprises a single copy of the mature peptide. In some insects, such as *Tribolium*  
360 *castaneum* and *Bombyx mori*, alternative splicing of DH<sub>44</sub> transcripts results in multiple  
361 mature peptide isoforms of varying lengths [41, 88]. The situation in lophotrochozoans is  
362 more complex, with several species having multiple precursors and some of these precursors  
363 comprising multiple ELH mature peptides [4, 89]. A single CRH-type precursor was found  
364 previously in the starfish *A. rubens*, whereas here we have identified four CRH-type  
365 precursors in *O. victoriae* (**Figure S2 and 6D**). Thus, expanded families of CRH-type

366 peptides and receptors appear to have evolved independently in multiple animal lineages,  
367 including chordates and ophiuroid echinoderms [90, 91].

368

### 369 *Diversity in neuropeptide precursor structure: new insights from ophiuroids*

370

#### 371 Tachykinins

372 The mammalian neuropeptide substance P was the first tachykinin-type peptide to be  
373 isolated and sequenced [92-94]. Subsequently, tachykinin-type peptides were discovered in  
374 other animals including tunicates [95], insects [96, 97], annelids [98] and molluscs [99].  
375 Tachykinin-type peptides regulate various physiological processes including muscle  
376 contractility [100], nociception [101] and stress responses [102] amongst others [103].  
377 Analysis of genomic/transcriptomic sequence data from the sea urchin *S. purpuratus* and the  
378 sea cucumber *A. japonicus* did not identify candidate tachykinin-type precursors [6, 7, 15,  
379 16]. However, recently a putative tachykinin-type precursor was discovered in the starfish *A.*  
380 *rubens* (ArTKP), indicating that this signaling system does occur in some echinoderms [8].  
381 Here we have identified orthologs of ArTKP in *O. victoriae* and other ophiuroids (**Figure 4**  
382 **and 7A**). Collectively, these findings indicate that this signaling system has been retained in  
383 the Asterozoa but lost in the Echinozoa. Comparison of the structure of the asterozoan  
384 tachykinin-type precursors reveals that the *A. rubens* precursor (ArTKP) comprises two  
385 putative mature peptides, whereas the *O. victoriae* precursor comprises four mature peptides  
386 (**Figure 7B**). It remains to be determined, however, which of these two conditions represents  
387 the ancestral state in the common ancestor of the Asterozoa. Further insights into this issue  
388 may be obtained if sequence data from a variety of starfish species are analysed.

389

#### 390 Kisspeptins (KP)

391 Kisspeptin (formerly known as metastin) is encoded by the *KiSS1* gene in humans.  
392 *KiSS1* was originally discovered as a gene that may suppress the metastatic potential of  
393 malignant melanoma cells [104]. Subsequently, it was found to play a vital role in regulating  
394 the onset of puberty. Thus, in vertebrates kisspeptin binds to its receptor GPR54 to stimulate  
395 pituitary release of gonadotropin-releasing hormone (GnRH) [105]. The first KP-type  
396 precursors to be identified in non-chordates were discovered recently in ambulacrarians - the  
397 echinoderms *A. rubens* and *S. purpuratus* and the hemichordate *S. kowalevskii* [8].  
398 Accordingly, here we have identified KP-type precursors in *O. victoriae* and other  
399 ophiuroids. All of the ambulacrarian precursor proteins comprise two KP-type peptides and  
400 the first putative neuropeptide in the echinoderm precursors has two cysteine residues at the

401 N-terminus, which could form an N-terminal disulphide bridge similar that of calcitonin-type  
402 peptides (see below). In contrast, the second putative neuropeptide does not contain any  
403 cysteine residues and is typically shorter than the first peptide (**Figure 7C and D**).  
404 Interestingly, comparison of the sequences of the first (long) and second (short) KP-type  
405 peptides in echinoderms reveals that the long and short peptides share less sequence  
406 similarity with each other within a species than they do with respective peptides in other  
407 species (**Figure 7C**). This indicates that the duplication event that gave rise to the occurrence  
408 of the long and short peptides occurred before the divergence of the Asterozoa and  
409 Echinozoa. Interestingly, previous studies have revealed that there has been an expansion of  
410 KP-type receptors in ambulacraria (*S. purpuratus* and *S. kowalevskii*) and in the  
411 cephalochordate, *Branchiostoma floridae*, with 16 KP receptors present in the latter [6, 54].  
412 Further studies are now needed to identify the proteins that act as receptors for the KP-type  
413 peptides identified here in ophiuroids and previously in other echinoderms [8].

414

#### 415 Calcitonin

416 Calcitonin was first discovered in 1962 by Copp and Cheney [106]. The sequencing of  
417 the porcine calcitonin in 1968 revealed that this polypeptide is composed of 32 amino acids  
418 [107]. In vertebrates, calcitonin is produced by the thyroid gland [108] and regulates calcium  
419 ( $\text{Ca}^{2+}$ ) levels in the blood, antagonizing the effects of parathyroid hormone [109, 110]. The  
420 evolutionary antiquity of calcitonin-related peptides was first revealed with the discovery that  
421 a diuretic hormone in insects ( $\text{DH}_{31}$ ) is a calcitonin-like peptide [111]. However,  $\text{DH}_{31}$  shares  
422 modest sequence similarity with vertebrate calcitonins and lacks the N-terminal disulphide  
423 bridge that is characteristic of calcitonin-type peptides in vertebrates. More recently, it has  
424 been discovered that both  $\text{DH}_{31}$ -type and vertebrate calcitonin-type neuropeptides occur in  
425 some protostomian invertebrates, including the annelid *Platynereis dumerilii* and the insect  
426 *Locusta migratoria* [4, 112]. Hence, it is proposed that an ancestral-type calcitonin precursor  
427 gene duplicated in the common ancestor of protostomes to give rise to  $\text{DH}_{31}$ -type and  
428 calcitonin-type peptides, but with subsequent loss of calcitonin-type peptides in some  
429 protostomes. Consistent with this hypothesis, calcitonin-type precursors but not  $\text{DH}_{31}$ -type  
430 precursors have been identified in deuterostomian invertebrates, including echinoderms [8,  
431 15, 16, 113].

432 An interesting feature of calcitonin/ $\text{DH}_{31}$  precursors is the occurrence of multiple  
433 splice variants. In vertebrates, alternative splicing of the calcitonin gene results in two  
434 transcripts: one transcript encodes calcitonin and the other transcript encodes calcitonin gene-  
435 related peptide [114]. Furthermore, a complex interplay of receptors and accessory proteins

436 determines the pharmacological profile of these peptides [115, 116]. Alternative splicing of  
437 DH<sub>31</sub> and calcitonin precursors in insects has also been previously reported [112, 117, 118].  
438 Interestingly, alternative splicing of insect calcitonin genes also generates variants that give  
439 rise to different mature peptides [112]. However, unlike the calcitonin gene, DH<sub>31</sub> splice  
440 variants all produce an identical mature peptide [117, 118].

441 Our analysis of the ophiuroid transcriptomes also identified two transcript variants for  
442 calcitonin (**Figure 7E and F**). Based on our analysis of transcript sequences, ophiuroid  
443 calcitonin genes comprise at least three putative coding regions or ‘exons’. It is unclear if  
444 these three coding regions represent three or more exons due to the lack of genomic data, but  
445 for the sake of simplicity, we refer to them here as ‘exons’. Transcript variant 1 comprises  
446 ‘exons’ 1 and 3 but lacks ‘exon’ 2 whereas transcript variant 2 contains all 3 ‘exons’.  
447 Interestingly, ‘exons’ 2 and 3 both encode a calcitonin-type peptide. Hence, transcript variant  
448 1 encodes a precursor that produces one calcitonin-type peptide and transcript variant 2  
449 encodes two non-identical calcitonin-type peptides. These alternatively spliced transcripts  
450 were found in several brittle star species (**Figure 8**) and thus this may represent an ancient  
451 and conserved feature, although transcript variant 1 was not found in *O. victoriae*.

452 Previous studies have identified precursors comprising a single calcitonin-type  
453 peptide in the starfish *A. rubens* and the sea urchin *S. purpuratus* [8, 16], and a precursor  
454 comprising two calcitonin-type peptides in the sea cucumber *A. japonicus* [15]. Informed by  
455 the identification here of two transcript types in ophiuroids (transcript variant 1 and 2), we  
456 have now discovered that two transcript types also occur in *A. japonicus* transcriptome.  
457 Hence, alternative splicing of calcitonin-type precursor genes can be traced back in the  
458 echinoderm lineage to the common ancestor of the Asterozoa and Echinozoa, but with  
459 subsequent loss of this characteristic in some lineages.

460

#### 461 GPA2 and GPB5

462 The vertebrate glycoprotein hormone family comprises luteinizing hormone (LH)  
463 follicle-stimulating hormone (FSH), chorionic gonadotropin (CG), thyroid-stimulating  
464 hormone (TSH) and the recently discovered thyrostimulin (TS) [119, 120]. Thyrostimulin is a  
465 heterodimer composed of two subunits, glycoprotein alpha 2 (GPA2) and glycoprotein beta 5  
466 (GPB5). Orthologs of GPA2 and GPB5 have been identified and characterized in the insect  
467 *Drosophila melanogaster* [121] and in other invertebrates, including echinoderms [122].  
468 Insect GPA2 and GPB5 both contain 10 conserved cysteine residues that are important in  
469 forming a heterodimeric cysteine-knot structure. Surprisingly, *A. japonicus* GPA2 contains  
470 only 7 cysteine residues (having lost residues 7, 8 and 9) while *O. victoriae* GPB5.1, *A.*

471 *rubens* GPB5.1 and *S. purpuratus* GPB5 all contain 8 cysteine residues (having lost the final  
472 two cysteine residues) (**Figure S5**). It is difficult to predict the structural differences that may  
473 arise in the heterodimer due to this variability in the number of cysteine residues. The  
474 possibility of GPA2 and/or GPB5 monomers or homodimers exerting their own biological  
475 functions has not been ruled out [123]. Additional investigations are needed to investigate if  
476 GPA2 and GPB5 are co-localized in echinoderms and if the monomers and dimers (both  
477 homo and hetero) exert different effects.

478

### 479 *Uncharacterized neuropeptides*

480 In addition to the neuropeptides discussed above, we have also identified three  
481 neuropeptide precursors that could not be classified into any known neuropeptide families.  
482 These include *O. victoriae* neuropeptide precursor (Ovnp) 18 (*O. victoriae* ortholog of  
483 Spnp18 in *S. purpuratus*) [16], Ovnp26 and Ovnp27, with the latter two identified for the first  
484 time in echinoderms. The choice of nomenclature for Ovnp26 and Ovnp27 is based on a  
485 previously used numerical nomenclature in *S. purpuratus* and/or *A. rubens*, which goes up to  
486 Arnp25 in *A. rubens*.

487

#### 488 Ovnp18

489 Ovnp18 comprises four copies of a predicted mature peptide with the sequence  
490 LFWVD and the C-terminal region of the precursor (partial sequence) contains at least four  
491 cysteine residues (**Figure 5F**). Interestingly, this precursor type only comprises a single  
492 mature peptide in *A. rubens*, *S. purpuratus* and *A. japonicus* and the C-terminal region  
493 contains 9, 8 and 8 cysteine residues, respectively (data not shown) [8, 15, 16].

494

#### 495 Ovnp26

496 Ovnp26 was identified following an analysis of *O. victoriae* transcriptome sequence  
497 using NpSearch [8]. Orthologs of Ovnp26 were identified in other brittle stars but not in other  
498 echinoderms (**Figure S2-S4**). Ovnp26 comprises seven copies of peptides with a conserved  
499 C-terminal GW motif, whereas orthologs in *O. aranea* and *A. filiformis* are predicted to  
500 generate eight copies of the mature peptide. Some of the mature peptides have a C-terminal  
501 SGW motif, which is similar to the C-terminus of predicted mature peptides derived from *O.*  
502 *victoriae* pedal peptide precursor 3 (**Figure S7**). However, the lack of sequence similarity in  
503 other parts of the peptide suggests that the C-terminal similarity may reflect convergence  
504 rather than homology.

505



## 506 Ovnp27

507 Ovnp27 was identified following a HMM-based search for SIFamide-type peptides  
508 [124, 125], albeit with a high E-value. This neuropeptide precursor comprises two putative  
509 amidated mature peptides that are located immediately after the signal peptide (**Figure S2-**  
510 **S4**), as seen in SIFamide precursors [126]. The first peptide of the *O. victoriae* precursor has  
511 a C-terminal IFamide motif just like in insect SIFamides (**Figure S9**). However, there is no  
512 sequence similarity with SIFamides in the rest of the peptide. This coupled with the fact that  
513 SIFamide-type receptors have not been identified in echinoderms [6] suggests that the  
514 sequence similarity that peptides derived from Ovnp27-type precursors share with SIFamides  
515 may reflect convergence rather than homology.

516

## 517 *Neuropeptide precursors not found in brittle stars*

518 Our analysis of ophiuroid transcriptome sequence data did not reveal orthologs of the  
519 Spnp9 precursor from *S. purpuratus* or the Arnp21, Arnp22, Arnp23 and Arnp24 precursors  
520 from *A. rubens* [8, 16]. An Spnp9 ortholog is found in *A. japonicus* but not in *A. rubens* [15]  
521 and therefore this neuropeptide precursor type may be restricted to the Echinozoa. Orthologs  
522 of Arnp21-24 have not been found in *O. victoriae*, *S. purpuratus* or *A. japonicus*, which  
523 suggests that these may be Asteroidea-specific precursors.

524 Previous studies have shown that receptors for leucokinin, ecdysis-triggering  
525 hormone, QRFP, parathyroid, galanin/allatostatins-A and Neuromedin-U/CAPA are present  
526 in ambulacraria [6, 7, 15]. The presence of these receptors suggests that their cognate ligands  
527 should also be present in ambulacraria. However, our search approaches failed to identify any  
528 proteins in ophiuroids that resemble precursors of these neuropeptides.

529

## 530 *Evolutionary conservation and variation of neuropeptide copy number in the Ophiuroidea*

531 Many neuropeptide precursors comprise several structurally similar but non-identical  
532 bioactive peptides – i.e. the precursor protein gives rise to a neuropeptide “cocktail”. This  
533 feature of neuropeptide precursors occurs throughout metazoans. But how do these  
534 “cocktails” of neuropeptides evolve and what is their functional significance? Are the copies  
535 of mature peptides functionally redundant or do they have their own specific functions?  
536 These are important questions in neuroendocrinology for which answers remain elusive.

537 Evidence that neuropeptide copy number may be functionally important has been  
538 obtained from comparison of the sequences of neuropeptide precursors in twelve *Drosophila*  
539 species, the common ancestor of which dates back ~50 million years [127]. The number of  
540 peptide copies in each neuropeptide precursor was found to be identical (except for the

541 FMRFamide precursor) when compared between the twelve species, suggesting that  
542 stabilising selection has acted to conserve neuropeptide “cocktails” in the *Drosophila* lineage.

543 Here, a comparison of *O. victoriae*, *A. filiformis* and *O. aranea* neuropeptide  
544 precursors and their putative mature peptides revealed that fourteen neuropeptide precursors  
545 comprised multiple neuropeptide copies. In certain cases, the number of the mature peptides  
546 derived from a particular precursor varied across species, whereas in other cases the numbers  
547 remained constant (**Figure 4**). Interestingly, these three species belong to two of the three  
548 major clades of brittle stars that evolved ~270 million years ago [12]. While *O. victoriae*  
549 belongs to the Chilophiurina infraorder (clade A), *A. filiformis* and *O. aranea* belong to the  
550 Gnathophiurina infraorder (clade C). Hence, this prompted us to examine the evolution of  
551 neuropeptides and neuropeptide copy number variation at a higher level of phylogenetic  
552 resolution. To do this, we utilized a unique dataset comprising 52 ophiuroid transcriptomes.  
553 These transcriptomes were recently used as part of a phylotranscriptomic approach to  
554 reconstruct the phylogeny of ophiuroids, generating a robust phylogenetic tree that comprises  
555 three major clades [12]. Hence, this dataset allowed us to explore the evolution of  
556 neuropeptide precursors in the context of an established phylogenetic framework spanning  
557 over an unprecedented timescale of ~270 million years.

558 We selected for analysis neuropeptide precursors comprising more than a one putative  
559 mature neuropeptide, which include AN peptide, calcitonin, cholecystokinin 1, kisspeptin,  
560 np18, np26, np27, NG peptide, PDF, SALMFamide (L-type and F-type), tachykinin and TRH  
561 (1 and 2). Pedal peptide precursors (1, 2 and 3) were excluded from the analysis because  
562 orthology relationships between these precursors could not be established with confidence  
563 across all species (data not shown). We used *O. victoriae* representatives of these  
564 neuropeptide precursor families and the *A. filiformis* AN peptide precursor to mine 52  
565 ophiuroid transcriptomes using BLAST. Multiple sequence alignments were generated based  
566 on the search hits (**Figure S10**) and the number of predicted mature peptides were compared  
567 (**Figure 8**). Interestingly, the number of peptides within the majority of precursors remained  
568 constant across all the species examined, which share a common ancestor estimated to date  
569 from ~270 million years ago [12].

570 Some studies that have investigated the physiological significance of neuropeptide  
571 “cocktails” indicate that neuropeptides derived from the same precursor protein are  
572 functionally redundant. For example, this was found for myomodulin neuropeptides in the  
573 mollusk *Aplysia californica* using the accessory radula closer muscle preparation as a  
574 bioassay [128] and for FMRFamide-related neuropeptides in *Drosophila melanogaster* when  
575 analysing effects on nerve-stimulated contraction of larval body-wall muscles [129].

576 However, the authors of the latter study cautiously highlighted the need to “search for  
577 additional functions or processes in which these peptides may act differentially”. Importantly,  
578 studies employing use of multiple bioassays have obtained data indicating that neuropeptides  
579 derived from a single precursor protein are not functionally redundant. For example, when  
580 the actions of fourteen structurally related neuropeptides derived from a precursor of *Mytilus*  
581 Inhibitory Peptide-related peptides in *Aplysia* were tested on three organ preparations  
582 (oesophagus, penis retractor, body wall) it was found that the rank order of potency for the  
583 peptides differed between preparations [130]. Similarly, when assaying the effects of  
584 allatostatin neuropeptides in cockroaches, tissue-specific differences in potency were  
585 observed [131]. The conservation of peptide copy number across a timescale of ~270 million  
586 years in the Ophiuroidea supports the idea that the occurrence of multiple copies of identical  
587 or structurally related neuropeptides is functionally important.

588 For those neuropeptide precursors that did exhibit variation in neuropeptide copy  
589 number, TRH-type precursors exhibited the highest variation, with numbers ranging from 16  
590 to 20 copies (**Figure 9**). F-type SALMFamide precursors also showed variation in copy  
591 numbers (**Figure 10**) but loss of peptides was more frequent in F-type SALMFamide  
592 precursors than in TRH-type precursors. Furthermore, detailed analysis of sequence  
593 alignments for these precursors revealed that loss of neuropeptide copies is usually a  
594 consequence of non-synonymous mutations in codons for residues that form dibasic cleavage  
595 sites or for glycine residues that are substrates for the C-terminal amidation. This is not  
596 surprising since the C-terminal amide in smaller-sized peptides is usually important for  
597 receptor binding and activation. What is unclear at the moment is how the peptide copy  
598 number increases within a given precursor. Perhaps the increase in peptide copy number  
599 occurs as a result of unequal crossing-over during recombination [127].

600 The number of peptides within the F-type SALMFamide precursors appear to be clade  
601 specific. Thus, the average/median number of F-type SALMFamides in precursors from clade  
602 A is 13, clade B is 12 and clade C is 11, with a few exceptions (**Figure 8**). Similarly, the  
603 number of peptides within NP26-type precursors also appears to be clade specific. Hence the  
604 number of peptides is highly stable at 7 peptides within clades A and B but a high variation in  
605 peptide copy number is observed in clade C. When examining peptide copy number within  
606 clades, there are a few cases where the number of peptides within a given precursor for  
607 certain species appears to be an exception/outlier. For instance, 16 copies of the mature  
608 peptide in *Ophioplax lamellosa* TRH-1 precursor is distinctly different to the 19 copies found  
609 in other species within that clade (clade C). Likewise, *Ophiactis savignyi* only has 3 copies of  
610 kisspeptin-type peptides compared to 4 copies found in other species of that clade (**Figure 8**).

611 It could be argued that misalignments during transcriptome assembly may have  
612 influenced the number of predicted peptides found in a given precursor. However, it is  
613 unlikely that misalignments have affected the predicted sequences of neuropeptide precursors  
614 comprising multiple copies of peptides that are similar but non-identical, which applies to the  
615 majority of the precursor proteins analysed here in ophiuroids. The only exception to this are  
616 the TRH-type precursors, where the encoded peptide sequences are short and often identical,  
617 even at the nucleotide level (data not shown). Another limitation of using transcriptome data  
618 is that the sequences of neuropeptide precursors may be partial or unknown for some species  
619 and where this applies a peptide copy number is not shown in Fig. 8. An extreme example of  
620 this is the AN peptide precursor, where complete precursor sequences were only obtained  
621 from the three reference species and three other species. However, for the majority of  
622 precursor types, sequence data was obtained from a variety of species from each of the three  
623 clades of ophiuroids. For example, complete F-type SALMFamide precursor sequences were  
624 found in most of the investigated species (39 species + 3 reference species).

625

## 626 **Conclusion**

627 Here we report the first detailed analysis of the neuropeptide precursor complement of  
628 ophiuroids and the most comprehensive identification of echinoderm neuropeptide precursors  
629 to date. We have identified novel representatives of several bilaterian neuropeptide families  
630 in echinoderms for the first time, which include orthologs of endothelin/CCHamide, eclosion  
631 hormone, neuropeptide-F/Y and nucleobinin/nesfatin. Furthermore, analysis of precursor  
632 proteins comprising multiple copies of identical or related neuropeptides across ~270 million  
633 years of ophiuroid evolution indicates that the precise composition of neuropeptide  
634 “cocktails” is functionally important as evident from the conservation of neuropeptide copy  
635 number for multiple precursors.

636

## 637 **Methods**

### 638 ***Sequencing and assembly of transcriptomes***

639 Ophiuroid transcriptomes used in this study were sequenced and assembled as  
640 reported previously [[12](#), [20](#), [24](#)].

641

### 642 ***Identification of neuropeptide precursors in ophiuroids***

643 In order to identify neuropeptide precursors in *O. victoriae*, *A. filiformis* and *O.*  
644 *aranea*, sequences of neuropeptide precursors identified previously in other echinoderms  
645 (including the starfish, *A. rubens*, the sea urchin *S. purpuratus* and the sea cucumber, *A.*

646 *japonicus*) were used as queries for tBLASTn analysis of a transcriptome database, using an e  
647 value of 1000. Sequences identified as potential neuropeptide precursors by BLAST were  
648 translated using the ExPASy Translate tool (<http://web.expasy.org/translate/>) and then  
649 analysed for features of neuropeptide precursors. Specifically, sequences were evaluated  
650 based on 1) the presence of an N-terminal signal peptide (using Signal P v 4.1 with the  
651 sensitive cut-off of 0.34) and 2) the presence of monobasic or dibasic cleavage sites flanking  
652 the putative bioactive peptide(s).

653 To identify novel neuropeptide precursors or highly-divergent precursors with low  
654 sequence similarity to known precursors, we utilized two additional approaches. In the first  
655 approach, we used NpSearch [8], software that identifies putative neuropeptide precursors  
656 based on various characteristics (presence of signal peptide and dibasic cleavage sites  
657 amongst others). In the second approach, NpHMMer (<http://nphmmmer.sbcs.qmul.ac.uk/>), a  
658 Hidden Markov Models (HMM) based software was used to identify neuropeptides not found  
659 using the above approaches.

660 Neuropeptide precursors identified in *O. victoriae* (which represented a more  
661 comprehensive neuropeptide precursor repertoire compared to *A. filiformis* and *O. aranea*)  
662 were then submitted as queries for BLAST analysis of sequence data from 52 Ophiuroidea  
663 species, using an E-value of 1e-06. BLAST hits were then further analysed using an  
664 automated ruby script (available on Github). Each BLAST hit was translated using BioRuby  
665 and the open reading frame (ORF) containing the BLAST high-scoring segment pair was  
666 extracted. These ORFs were then examined for the presence of a signal peptide using Signal  
667 P 4.1 using a sensitive cut-off of 0.34. All sequences were then aligned using MAFFT, with  
668 the number of maximum iterations set to 1000 to ensure an optimal alignment. These  
669 alignments were then further optimized by manually adjusting the location of the bioactive  
670 peptide and cleavage sites. Finally, the alignments were annotated using different colours for  
671 the signal peptide (blue), the bioactive peptide(s) (red) and cleavage sites (green).

672

### 673 ***Phylogenetic and clustering analyses of sequence data***

674 Phylogenetic analysis of membrane guanylyl cyclase receptors and nucleobindins was  
675 performed using maximum likelihood and Bayesian methods. Prior to these analyses,  
676 corresponding multiple alignments were trimmed using BMGE [132] with the following  
677 options: BLOSUM30, max -h = 1, -b = 1, as described previously [10, 91]. The maximum  
678 likelihood method was implemented in the PhyML program (v3.1/3.0 aLRT). The WAG  
679 substitution model was selected assuming an estimated proportion of invariant sites (of  
680 0.112) and 4 gamma-distributed rate categories to account for rate heterogeneity across sites.

681 The gamma shape parameter was estimated directly from the data. Reliability for internal  
682 branch was assessed using the bootstrapping method (500 bootstrap replicates). The Bayesian  
683 inference method was implemented in the MrBayes program (v3.2.3). The number of  
684 substitution types was fixed to 6. The poisson model was used for substitution, while rates  
685 variation across sites was fixed to "invgamma". Four Markov Chain Monte Carlo (MCMC)  
686 chains were run for 100000 generations, sampling every 100 generations, with the first 500  
687 sampled trees discarded as "burn-in". Finally, a 50% majority rule consensus tree was  
688 constructed.

689 CLANS analysis was performed on echinoderm EH-like, arthropod EH, arthropod  
690 ITP and vertebrates ANP precursors based on all-against-all sequence similarity (BLAST  
691 searches) using BLOSUM 45 matrix (<https://toolkit.tuebingen.mpg.de/clans/>) [39] and the  
692 significant high-scoring segment pairs (HSPs). Neuropeptide precursors were clustered in a  
693 three-dimensional graph represented here in two dimensions.

694

#### 695 **Competing Interests**

696 The authors declare that no competing interests exist.

697

#### 698 **Author contributions**

699 M.Z., T.D.O. and M.R.E.: designed the research; I.M.: generated HMM models; M.Z., I.M.,  
700 L.A.Y.G., J.D., N.A. and A.F.H: identified the neuropeptide precursors; M.Z., I.M.,  
701 L.A.Y.G., J.D. and N.A.: analysed the data; M.Z., J.D. and M.R.E. wrote the manuscript with  
702 input from other authors. M.Z. and M.R.E: supervised the study.

703

#### 704 **Acknowledgements**

705 The authors would like to acknowledge Zuraiha Waffa and Giulia Oluwabunmi Olayemi for  
706 their assistance with sequence alignments. This work was supported by Leverhulme Trust  
707 grant (RPG-2013-351) and a BBSRC grant (BB/M001644/1) awarded to M.R.E. L.A.Y.G is  
708 supported by a PhD studentship awarded by CONACYT.

709 **References**

710

- 711 1. Nassel DR, Winther AM: **Drosophila neuropeptides in regulation of physiology**  
712 **and behavior.** *Prog Neurobiol* 2010, **92**(1):42-104.
- 713 2. Argiolas A, Melis MR: **Neuropeptides and central control of sexual behaviour**  
714 **from the past to the present: a review.** *Prog Neurobiol* 2013, **108**:80-107.
- 715 3. Sohn JW, Elmquist JK, Williams KW: **Neuronal circuits that regulate feeding**  
716 **behavior and metabolism.** *Trends Neurosci* 2013, **36**(9):504-512.
- 717 4. Conzelmann M, Williams EA, Krug K, Franz-Wachtel M, Macek B, Jekely G: **The**  
718 **neuropeptide complement of the marine annelid *Platynereis dumerilii*.** *BMC*  
719 *Genomics* 2013, **14**:906.
- 720 5. Veenstra JA: **Neuropeptide Evolution: Chelicerate Neurohormone and**  
721 **Neuropeptide Genes may reflect one or more whole genome duplications.** *Gen*  
722 *Comp Endocrinol* 2016.
- 723 6. Mirabeau O, Joly JS: **Molecular evolution of peptidergic signaling systems in**  
724 **bilaterians.** *Proc Natl Acad Sci U S A* 2013, **110**(22):E2028-2037.
- 725 7. Jekely G: **Global view of the evolution and diversity of metazoan neuropeptide**  
726 **signaling.** *Proc Natl Acad Sci U S A* 2013, **110**(21):8702-8707.
- 727 8. Semmens DC, Mirabeau O, Moghul I, Pancholi MR, Wurm Y, Elphick MR:  
728 **Transcriptomic identification of starfish neuropeptide precursors yields new**  
729 **insights into neuropeptide evolution.** *Open Biol* 2016, **6**(2):150224.
- 730 9. Semmens DC, Beets I, Rowe ML, Blowes LM, Oliveri P, Elphick MR: **Discovery of**  
731 **sea urchin NGFFFamide receptor unites a bilaterian neuropeptide family.** *Open*  
732 *Biol* 2015, **5**(4):150030.
- 733 10. Tian S, Zandawala M, Beets I, Baytemur E, Slade SE, Scrivens JH, Elphick MR:  
734 **Urbilaterian origin of paralogous GnRH and corazonin neuropeptide signalling**  
735 **pathways.** *Sci Rep* 2016, **6**:28788.
- 736 11. Telford MJ, Lowe CJ, Cameron CB, Ortega-Martinez O, Aronowicz J, Oliveri P,  
737 Copley RR: **Phylogenomic analysis of echinoderm class relationships supports**  
738 **Asterozoa.** *Proc Biol Sci* 2014, **281**(1786).
- 739 12. O'Hara TD, Hugall AF, Thuy B, Moussalli A: **Phylogenomic resolution of the class**  
740 **Ophiuroidea unlocks a global microfossil record.** *Current Biology* 2014,  
741 **24**(16):1874-1879.
- 742 13. Hyman LH: **The invertebrates. Vol. 4. Echinodermata, 763 pp.** *MacGraw-Hill:*  
743 *New York* 1955.
- 744 14. Wilkie I: **Autotomy as a prelude to regeneration in echinoderms.** *Microscopy*  
745 *research and technique* 2001, **55**(6):369-396.
- 746 15. Rowe ML, Achhala S, Elphick MR: **Neuropeptides and polypeptide hormones in**  
747 **echinoderms: new insights from analysis of the transcriptome of the sea**  
748 **cucumber *Apostichopus japonicus*.** *Gen Comp Endocrinol* 2014, **197**:43-55.

- 749 16. Rowe ML, Elphick MR: **The neuropeptide transcriptome of a model echinoderm,**  
750 **the sea urchin *Strongylocentrotus purpuratus*.** *Gen Comp Endocrinol* 2012,  
751 **179(3):331-344.**
- 752 17. Mayorova TD, Tian S, Cai W, Semmens DC, Odekunle EA, Zandawala M, Badi Y,  
753 Rowe ML, Egertova M, Elphick MR: **Localization of Neuropeptide Gene**  
754 **Expression in Larvae of an Echinoderm, the Starfish *Asterias rubens*.** *Front*  
755 *Neurosci* 2016, **10**:553.
- 756 18. Kim CH, Kim EJ, Go HJ, Oh HY, Lin M, Elphick MR, Park NG: **Identification of a**  
757 **novel starfish neuropeptide that acts as a muscle relaxant.** *J Neurochem* 2016,  
758 **137(1):33-45.**
- 759 19. Jones CE, Zandawala M, Semmens DC, Anderson S, Hanson GR, Janies DA, Elphick  
760 MR: **Identification of a neuropeptide precursor protein that gives rise to a**  
761 **"cocktail" of peptides that bind Cu(II) and generate metal-linked dimers.**  
762 *Biochim Biophys Acta* 2016, **1860(1 Pt A):57-66.**
- 763 20. Elphick MR, Semmens DC, Blowes LM, Levine J, Lowe CJ, Arnone MI, Clark MS:  
764 **Reconstructing SALMFamide Neuropeptide Precursor Evolution in the Phylum**  
765 **Echinodermata: Ophiuroid and Crinoid Sequence Data Provide New Insights.**  
766 *Front Endocrinol (Lausanne)* 2015, **6**:2.
- 767 21. Lin M, Mita M, Egertova M, Zampronio CG, Jones AM, Elphick MR: **Cellular**  
768 **localization of relaxin-like gonad-stimulating peptide expression in *Asterias***  
769 ***rubens*: New insights into neurohormonal control of spawning in starfish.** *J*  
770 *Comp Neurol* 2016.
- 771 22. Stöhr S, O'Hara TD, Thuy B: **Global diversity of brittle stars (Echinodermata:**  
772 **Ophiuroidea).** *PLoS One* 2012, **7(3):e31940.**
- 773 23. Shackleton JD: **Skeletal homologies, phylogeny and classification of the earliest**  
774 **asterozoan echinoderms.** *Journal of Systematic Palaeontology* 2005, **3(1):29-114.**
- 775 24. Delroisse J, Mallefet J, Flammang P: **De Novo Adult Transcriptomes of Two**  
776 **European Brittle Stars: Spotlight on Opsin-Based Photoreception.** *PLoS One*  
777 2016, **11(4):e0152988.**
- 778 25. Delroisse J, Ortega-Martinez O, Dupont S, Mallefet J, Flammang P: **De novo**  
779 **transcriptome of the European brittle star *Amphiura filiformis pluteus* larvae.**  
780 *Marine genomics* 2015, **23**:109-121.
- 781 26. Burns G, Thorndyke MC, Peck LS, Clark MS: **Transcriptome pyrosequencing of**  
782 **the Antarctic brittle star *Ophionotus victoriae*.** *Mar Genomics* 2013, **9**:9-15.
- 783 27. Cannon JT, Kocot KM, Waits DS, Weese DA, Swalla BJ, Santos SR, Halanych KM:  
784 **Phylogenomic resolution of the hemichordate and echinoderm clade.** *Curr Biol*  
785 2014, **24(23):2827-2832.**
- 786 28. Vaughn R, Garnhart N, Garey JR, Thomas WK, Livingston BT: **Sequencing and**  
787 **analysis of the gastrula transcriptome of the brittle star *Ophiocoma wendtii*.**  
788 *Evodevo* 2012, **3(1):19.**



- 789 29. Purushothaman S, Saxena S, Meghah V, Swamy CV, Ortega-Martinez O, Dupont S,  
790 Idris M: **Transcriptomic and proteomic analyses of *Amphiura filiformis* arm**  
791 **tissue-undergoing regeneration.** *J Proteomics* 2015, **112**:113-124.
- 792 30. Smith AB, Paterson GL, Lafay B: **Ophiuroid phylogeny and higher taxonomy:**  
793 **morphological, molecular and palaeontological perspectives.** *Zoological Journal*  
794 *of the Linnean Society* 1995, **114**(2):213-243.
- 795 31. Thuy B, Stohr S: **A New Morphological Phylogeny of the Ophiuroidea**  
796 **(Echinodermata) Accords with Molecular Evidence and Renders Microfossils**  
797 **Accessible for Cladistics.** *PLoS One* 2016, **11**(5):e0156140.
- 798 32. O'Hara TD, Hugall AF, Thuy B, Stohr S, Martynov AV: **Restructuring higher**  
799 **taxonomy using broad-scale phylogenomics: The living Ophiuroidea.** *Mol*  
800 *Phylogenet Evol* 2017, **107**:415-430.
- 801 33. Truman JW, Riddiford LM: **Neuroendocrine control of ecdysis in silkmths.**  
802 *Science* 1970, **167**(3925):1624-1626.
- 803 34. Kataoka H, Troetschler RG, Kramer SJ, Cesarin BJ, Schooley DA: **Isolation and**  
804 **primary structure of the eclosion hormone of the tobacco hornworm, *Manduca***  
805 ***sexta*.** *Biochem Biophys Res Commun* 1987, **146**(2):746-750.
- 806 35. Ewer J: **Behavioral actions of neuropeptides in invertebrates: insights from**  
807 ***Drosophila*.** *Horm Behav* 2005, **48**(4):418-429.
- 808 36. Zitnan D, Kim YJ, Zitnanova I, Roller L, Adams ME: **Complex steroid-peptide-**  
809 **receptor cascade controls insect ecdysis.** *Gen Comp Endocrinol* 2007, **153**(1-3):88-  
810 96.
- 811 37. Chang JC, Yang RB, Adams ME, Lu KH: **Receptor guanylyl cyclases in Inka cells**  
812 **targeted by eclosion hormone.** *Proc Natl Acad Sci U S A* 2009, **106**(32):13371-  
813 13376.
- 814 38. McNabb SL, Baker JD, Agapite J, Steller H, Riddiford LM, Truman JW: **Disruption**  
815 **of a behavioral sequence by targeted death of peptidergic neurons in *Drosophila*.**  
816 *Neuron* 1997, **19**(4):813-823.
- 817 39. Frickey T, Lupas A: **CLANS: a Java application for visualizing protein families**  
818 **based on pairwise similarity.** *Bioinformatics* 2004, **20**(18):3702-3704.
- 819 40. Vogel KJ, Brown MR, Strand MR: **Phylogenetic investigation of Peptide hormone**  
820 **and growth factor receptors in five dipteran genomes.** *Front Endocrinol*  
821 *(Lausanne)* 2013, **4**:193.
- 822 41. Roller L, Yamanaka N, Watanabe K, Daubnerova I, Zitnan D, Kataoka H, Tanaka Y:  
823 **The unique evolution of neuropeptide genes in the silkworm *Bombyx mori*.** *Insect*  
824 *Biochem Mol Biol* 2008, **38**(12):1147-1157.
- 825 42. Hansen KK, Hauser F, Williamson M, Weber SB, Grimmlikhuijzen CJ: **The**  
826 ***Drosophila* genes CG14593 and CG30106 code for G-protein-coupled receptors**  
827 **specifically activated by the neuropeptides CCHamide-1 and CCHamide-2.**  
828 *Biochem Biophys Res Commun* 2011, **404**(1):184-189.

- 829 43. Ida T, Takahashi T, Tominaga H, Sato T, Sano H, Kume K, Ozaki M, Hiraguchi T,  
830 Shiotani H, Terajima S *et al*: **Isolation of the bioactive peptides CCHamide-1 and**  
831 **CCHamide-2 from *Drosophila* and their putative role in appetite regulation as**  
832 **ligands for G protein-coupled receptors.** *Front Endocrinol (Lausanne)* 2012, **3**:177.
- 833 44. Farhan A, Gulati J, Grobete-Wilde E, Vogel H, Hansson BS, Knaden M: **The**  
834 **CCHamide 1 receptor modulates sensory perception and olfactory behavior in**  
835 **starved *Drosophila*.** *Sci Rep* 2013, **3**:2765.
- 836 45. Ren GR, Hauser F, Rewitz KF, Kondo S, Engelbrecht AF, Didriksen AK, Schjott SR,  
837 Sembach FE, Li S, Sogaard KC *et al*: **CCHamide-2 Is an Orexigenic Brain-Gut**  
838 **Peptide in *Drosophila*.** *PLoS One* 2015, **10**(7):e0133017.
- 839 46. Veenstra JA: **Neurohormones and neuropeptides encoded by the genome of *Lottia***  
840 ***gigantea*, with reference to other mollusks and insects.** *Gen Comp Endocrinol*  
841 2010, **167**(1):86-103.
- 842 47. Oumi T, Ukena K, Matsushima O, Ikeda T, Fujita T, Minakata H, Nomoto K: **The**  
843 **GGNG peptides: novel myoactive peptides isolated from the gut and the whole**  
844 **body of the earthworms.** *Biochem Biophys Res Commun* 1995, **216**(3):1072-1078.
- 845 48. Tatemoto K, Carlquist M, Mutt V: **Neuropeptide Y--a novel brain peptide with**  
846 **structural similarities to peptide YY and pancreatic polypeptide.** *Nature* 1982,  
847 **296**(5858):659-660.
- 848 49. Tatemoto K: **Neuropeptide Y: complete amino acid sequence of the brain peptide.**  
849 *Proc Natl Acad Sci U S A* 1982, **79**(18):5485-5489.
- 850 50. Nassel DR, Wegener C: **A comparative review of short and long neuropeptide F**  
851 **signaling in invertebrates: Any similarities to vertebrate neuropeptide Y**  
852 **signaling?** *Peptides* 2011, **32**(6):1335-1355.
- 853 51. Reichmann F, Holzer P: **Neuropeptide Y: A stressful review.** *Neuropeptides* 2016,  
854 **55**:99-109.
- 855 52. Haas DA, George SR: **Neuropeptide Y-induced effects on hypothalamic**  
856 **corticotropin-releasing factor content and release are dependent on**  
857 **noradrenergic/adrenergic neurotransmission.** *Brain Res* 1989, **498**(2):333-338.
- 858 53. Maule AG, Shaw C, Halton DW, Thim L, Johnston CF, Fairweather I, Buchanan KD:  
859 **Neuropeptide-F - a Novel Parasitic Flatworm Regulatory Peptide from**  
860 ***Moniezia-Expansa* (Cestoda, Cyclophyllidea).** *Parasitology* 1991, **102**:309-316.
- 861 54. Elphick MR, Mirabeau O: **The Evolution and Variety of RFamide-Type**  
862 **Neuropeptides: Insights from Deuterostomian Invertebrates.** *Front Endocrinol*  
863 *(Lausanne)* 2014, **5**:93.
- 864 55. Kanai Y, Tanuma S: **Purification of a novel B cell growth and differentiation**  
865 **factor associated with lupus syndrome.** *Immunol Lett* 1992, **32**(1):43-48.
- 866 56. Miura K, Titani K, Kurosawa Y, Kanai Y: **Molecular cloning of nucleobindin, a**  
867 **novel DNA-binding protein that contains both a signal peptide and a leucine**  
868 **zipper structure.** *Biochem Biophys Res Commun* 1992, **187**(1):375-380.

- 869 57. Gonzalez R, Mohan H, Unniappan S: **Nucleobindins: bioactive precursor proteins**  
870 **encoding putative endocrine factors?** *Gen Comp Endocrinol* 2012, **176**(3):341-346.
- 871 58. Oh IS, Shimizu H, Satoh T, Okada S, Adachi S, Inoue K, Eguchi H, Yamamoto M,  
872 Imaki T, Hashimoto K *et al*: **Identification of nesfatin-1 as a satiety molecule in the**  
873 **hypothalamus.** *Nature* 2006, **443**(7112):709-712.
- 874 59. Dore R, Levata L, Lehnert H, Schulz C: **Nesfatin-1: functions and physiology of a**  
875 **novel regulatory peptide.** *J Endocrinol* 2017, **232**(1):R45-R65.
- 876 60. Sundarrajan L, Blanco AM, Bertucci JI, Ramesh N, Canosa LF, Unniappan S:  
877 **Nesfatin-1-Like Peptide Encoded in Nucleobindin-1 in Goldfish is a Novel**  
878 **Anorexigen Modulated by Sex Steroids, Macronutrients and Daily Rhythm.** *Sci*  
879 *Rep* 2016, **6**:28377.
- 880 61. Burke RD, Angerer LM, Elphick MR, Humphrey GW, Yaguchi S, Kiyama T, Liang  
881 S, Mu X, Agca C, Klein WH *et al*: **A genomic view of the sea urchin nervous**  
882 **system.** *Dev Biol* 2006, **300**(1):434-460.
- 883 62. Elphick MR, Rowe ML: **NGFFFamide and echinotocin: structurally unrelated**  
884 **myoactive neuropeptides derived from neurophysin-containing precursors in sea**  
885 **urchins.** *J Exp Biol* 2009, **212**(Pt 8):1067-1077.
- 886 63. Mita M, Yoshikuni M, Ohno K, Shibata Y, Paul-Prasanth B, Pitchayawasin S, Isobe  
887 M, Nagahama Y: **A relaxin-like peptide purified from radial nerves induces**  
888 **oocyte maturation and ovulation in the starfish, Asterina pectinifera.** *Proc Natl*  
889 *Acad Sci U S A* 2009, **106**(23):9507-9512.
- 890 64. Elphick MR, Reeve JR, Jr., Burke RD, Thorndyke MC: **Isolation of the**  
891 **neuropeptide SALMFamide-1 from starfish using a new antiserum.** *Peptides*  
892 1991, **12**(3):455-459.
- 893 65. Schally AV, Bowers CY, Redding TW, Barrett JF: **Isolation of thyrotropin**  
894 **releasing factor (TRF) from porcine hypothalamus.** *Biochem Biophys Res*  
895 *Commun* 1966, **25**(2):165-169.
- 896 66. Boler J, Enzmann F, Folkers K, Bowers CY, Schally AV: **The identity of chemical**  
897 **and hormonal properties of the thyrotropin releasing hormone and**  
898 **pyroglutamyl-histidyl-proline amide.** *Biochem Biophys Res Commun* 1969,  
899 **37**(4):705-710.
- 900 67. Burgus R, Dunn TF, Desiderio D, Guillemin R: **[Molecular structure of the**  
901 **hypothalamic hypophysiotropic TRF factor of ovine origin: mass spectrometry**  
902 **demonstration of the PCA-His-Pro-NH<sub>2</sub> sequence].** *C R Acad Sci Hebd Seances*  
903 *Acad Sci D* 1969, **269**(19):1870-1873.
- 904 68. Guillemin R, Yamazaki E, Gard DA, Jutisz M, Sakiz E: **In Vitro Secretion of**  
905 **Thyrotropin (TSH): Stimulation by a Hypothalamic Peptide (TRF).**  
906 *Endocrinology* 1963, **73**:564-572.
- 907 69. Bowers CR, Redding TW, Schally AV: **Effect of thyrotropin releasing factor**  
908 **(TRF) of ovine, bovine, porcine and human origin on thyrotropin release in vitro**  
909 **and in vivo.** *Endocrinology* 1965, **77**(4):609-616.

- 910 70. Bauknecht P, Jekely G: **Large-Scale Combinatorial Deorphanization of**  
911 **Platynereis Neuropeptide GPCRs.** *Cell Rep* 2015, **12**(4):684-693.
- 912 71. Wilber JF, Yamada M, Kim UJ, Feng P, Carnell NE: **The human prepro**  
913 **thyrotropin-releasing hormone (TRH) gene: cloning, characterization, hormonal**  
914 **regulation, and gene localization.** *Trans Am Clin Climatol Assoc* 1992, **103**:111-  
915 119.
- 916 72. Mutt V, Jorpes JE: **Structure of Porcine Cholecystokinin-Pancreozymin .I.**  
917 **Cleavage with Thrombin and with Trypsin.** *Eur J Biochem* 1968, **6**(1):156-&.
- 918 73. Johnson LP, Magee DF: **Inhibition of Gastric Motility by a Commercial Duodenal**  
919 **Mucosal Extract Containing Cholecystokinin and Pancreozymin.** *Nature* 1965,  
920 **207**(5004):1401-&.
- 921 74. Cooke AR: **Effect of Pancreozymin Preparations on Gastric Secretion.** *Nature*  
922 1967, **214**(5089):729-&.
- 923 75. Jorpes E, Mutt V: **Cholecystokinin and pancreozymin, one single hormone?** *Acta*  
924 *Physiol Scand* 1966, **66**(1):196-202.
- 925 76. Beinfeld MC: **CHAPTER 99 - CCK/Gastrin A2 - Kastin, Abba J.** In: *Handbook of*  
926 *Biologically Active Peptides.* Burlington: Academic Press; 2006: 715-720.
- 927 77. Menschaert G, Vandekerckhove TT, Baggerman G, Landuyt B, Sweedler JV, Schoofs  
928 L, Luyten W, Van Crielinge W: **A hybrid, de novo based, genome-wide database**  
929 **search approach applied to the sea urchin neuropeptidome.** *J Proteome Res* 2010,  
930 **9**(2):990-996.
- 931 78. Cameron RA, Samanta M, Yuan A, He D, Davidson E: **SpBase: the sea urchin**  
932 **genome database and web site.** *Nucleic Acids Res* 2009, **37**(Database issue):D750-  
933 754.
- 934 79. Yu N, Nachman RJ, Smagghe G: **Characterization of sulfakinin and sulfakinin**  
935 **receptor and their roles in food intake in the red flour beetle Tribolium**  
936 **castaneum.** *Gen Comp Endocrinol* 2013, **188**:196-203.
- 937 80. Brazeau P, Vale W, Burgus R, Ling N, Butcher M, Rivier J, Guillemin R:  
938 **Hypothalamic Polypeptide That Inhibits the Secretion of Immunoreactive**  
939 **Pituitary Growth Hormone.** *Science* 1973, **179**(4068):77.
- 940 81. Epelbaum J: **Somatostatin in the central nervous system: physiology and**  
941 **pathological modifications.** *Prog Neurobiol* 1986, **27**(1):63-100.
- 942 82. Viollet C, Lepousez G, Loudes C, Videau C, Simon A, Epelbaum J:  
943 **Somatostatinergic systems in brain: networks and functions.** *Mol Cell Endocrinol*  
944 2008, **286**(1-2):75-87.
- 945 83. Schlegel W, Raptis S, Harvey RF, Oliver JM, Pfeiffer EF: **Inhibition of**  
946 **cholecystokinin-pancreozymin release by somatostatin.** *Lancet* 1977, **2**(8030):166-  
947 168.
- 948 84. Hayes JR, Johnson DG, Koerker D, Williams RH: **Inhibition of gastrin release by**  
949 **somatosatin in vitro.** *Endocrinology* 1975, **96**(6):1374-1376.

- 950 85. Tostivint H, Lihrmann I, Vaudry H: **New insight into the molecular evolution of the**  
951 **somatostatin family.** *Mol Cell Endocrinol* 2008, **286**(1-2):5-17.
- 952 86. Veenstra JA: **Allatostatin C and its paralog allatostatin double C: the arthropod**  
953 **somatostatins.** *Insect Biochem Mol Biol* 2009, **39**(3):161-170.
- 954 87. Veenstra JA: **Allatostatins C, double C and triple C, the result of a local gene**  
955 **triplication in an ancestral arthropod.** *Gen Comp Endocrinol* 2016, **230-231**:153-  
956 157.
- 957 88. Li B, Predel R, Neupert S, Hauser F, Tanaka Y, Cazzamali G, Williamson M,  
958 Arakane Y, Verleyen P, Schoofs L *et al*: **Genomics, transcriptomics, and**  
959 **peptidomics of neuropeptides and protein hormones in the red flour beetle**  
960 ***Tribolium castaneum*.** *Genome Res* 2008, **18**(1):113-122.
- 961 89. Stewart MJ, Favrel P, Rotgans BA, Wang T, Zhao M, Sohail M, O'Connor WA,  
962 Elizur A, Henry J, Cummins SF: **Neuropeptides encoded by the genomes of the**  
963 **Akoya pearl oyster *Pinctata fucata* and Pacific oyster *Crassostrea gigas*: a**  
964 **bioinformatic and peptidomic survey.** *BMC Genomics* 2014, **15**:840.
- 965 90. Cardoso JC, Felix RC, Bergqvist CA, Larhammar D: **New insights into the evolution**  
966 **of vertebrate CRH (corticotropin-releasing hormone) and invertebrate DH44**  
967 **(diuretic hormone 44) receptors in metazoans.** *Gen Comp Endocrinol* 2014,  
968 **209**:162-170.
- 969 91. Lee HR, Zandawala M, Lange AB, Orchard I: **Isolation and characterization of the**  
970 **corticotropin-releasing factor-related diuretic hormone receptor in *Rhodnius***  
971 **prolixus.** *Cell Signal* 2016, **28**(9):1152-1162.
- 972 92. Chang MM, Leeman SE: **Isolation of a sialogogic peptide from bovine**  
973 **hypothalamic tissue and its characterization as substance P.** *J Biol Chem* 1970,  
974 **245**(18):4784-4790.
- 975 93. Studer RO, Trzeciak A, Lergier W: **Isolierung und Aminosäuresequenz von**  
976 **Substanz P aus Pferdedarm.** *Helvetica Chimica Acta* 1973, **56**(3):860-866.
- 977 94. US VE, Gaddum JH: **An unidentified depressor substance in certain tissue**  
978 **extracts.** *J Physiol* 1931, **72**(1):74-87.
- 979 95. Satake H, Ogasawara M, Kawada T, Masuda K, Aoyama M, Minakata H, Chiba T,  
980 Metoki H, Satou Y, Satoh N: **Tachykinin and tachykinin receptor of an ascidian,**  
981 ***Ciona intestinalis*: evolutionary origin of the vertebrate tachykinin family.** *J Biol*  
982 **Chem** 2004, **279**(51):53798-53805.
- 983 96. Schoofs L, Holman GM, Hayes TK, Nachman RJ, De Loof A: **Locustatachykinin I**  
984 **and II, two novel insect neuropeptides with homology to peptides of the**  
985 **vertebrate tachykinin family.** *FEBS Lett* 1990, **261**(2):397-401.
- 986 97. Jiang H, Lkhagva A, Daubnerova I, Chae HS, Simo L, Jung SH, Yoon YK, Lee NR,  
987 Seong JY, Zitnan D *et al*: **Natalisin, a tachykinin-like signaling system, regulates**  
988 **sexual activity and fecundity in insects.** *Proc Natl Acad Sci U S A* 2013,  
989 **110**(37):E3526-3534.

- 990 98. Kawada T, Satake H, Minakata H, Muneoka Y, Nomoto K: **Characterization of a**  
991 **novel cDNA sequence encoding invertebrate tachykinin-related peptides isolated**  
992 **from the echiuroid worm, *Urechis unicinctus*. *Biochem Biophys Res Commun* 1999,**  
993 **263(3):848-852.**
- 994 99. Kanda A, Iwakoshi-Ukena E, Takuwa-Kuroda K, Minakata H: **Isolation and**  
995 **characterization of novel tachykinins from the posterior salivary gland of the**  
996 **common octopus *Octopus vulgaris*. *Peptides* 2003, 24(1):35-43.**
- 997 100. Kovac JR, Chrones T, Preiksaitis HG, Sims SM: **Tachykinin receptor expression**  
998 **and function in human esophageal smooth muscle. *J Pharmacol Exp Ther* 2006,**  
999 **318(2):513-520.**
- 1000 101. Im SH, Takle K, Jo J, Babcock DT, Ma Z, Xiang Y, Galko MJ: **Tachykinin acts**  
1001 **upstream of autocrine Hedgehog signaling during nociceptive sensitization in**  
1002 ***Drosophila*. *Elife* 2015, 4:e10735.**
- 1003 102. Kahsai L, Kapan N, Dircksen H, Winther AM, Nassel DR: **Metabolic stress**  
1004 **responses in *Drosophila* are modulated by brain neurosecretory cells that**  
1005 **produce multiple neuropeptides. *PLoS One* 2010, 5(7):e11480.**
- 1006 103. Nassel DR: **Tachykinin-related peptides in invertebrates: a review. *Peptides* 1999,**  
1007 **20(1):141-158.**
- 1008 104. Lee JH, Miele ME, Hicks DJ, Phillips KK, Trent JM, Weissman BE, Welch DR:  
1009 **KiSS-1, a novel human malignant melanoma metastasis-suppressor gene. *J Natl***  
1010 ***Cancer Inst* 1996, 88(23):1731-1737.**
- 1011 105. Messenger S, Chatzidaki EE, Ma D, Hendrick AG, Zahn D, Dixon J, Thresher RR,  
1012 Malinge I, Lomet D, Carlton MB *et al*: **Kisspeptin directly stimulates**  
1013 **gonadotropin-releasing hormone release via G protein-coupled receptor 54. *Proc***  
1014 ***Natl Acad Sci U S A* 2005, 102(5):1761-1766.**
- 1015 106. Copp DH, Cheney B: **Calcitonin-a hormone from the parathyroid which lowers**  
1016 **the calcium-level of the blood. *Nature* 1962, 193:381-382.**
- 1017 107. Potts JT, Jr., Niall HD, Keutmann HT, Brewer HB, Jr., Deftos LJ: **The amino acid**  
1018 **sequence of porcine thyrocalcitonin. *Proc Natl Acad Sci U S A* 1968, 59(4):1321-**  
1019 **1328.**
- 1020 108. Foster GV, Baghdiantz A, Kumar MA, Slack E, Soliman HA, Macintyre I: **Thyroid**  
1021 **Origin of Calcitonin. *Nature* 1964, 202:1303-1305.**
- 1022 109. Friedman J, Raisz LG: **Thyrocalcitonin: inhibitor of bone resorption in tissue**  
1023 **culture. *Science* 1965, 150(3702):1465-1467.**
- 1024 110. Wendelaar Bonga SE, Pang PK: **Control of calcium regulating hormones in the**  
1025 **vertebrates: parathyroid hormone, calcitonin, prolactin, and stanniocalcin. *Int***  
1026 ***Rev Cytol* 1991, 128:139-213.**
- 1027 111. Furuya K, Milchak RJ, Schegg KM, Zhang J, Tobe SS, Coast GM, Schooley DA:  
1028 **Cockroach diuretic hormones: characterization of a calcitonin-like peptide in**  
1029 **insects. *Proc Natl Acad Sci U S A* 2000, 97(12):6469-6474.**

- 1030 112. Veenstra JA: **The contribution of the genomes of a termite and a locust to our**  
1031 **understanding of insect neuropeptides and neurohormones.** *Front Physiol* 2014,  
1032 **5:454.**
- 1033 113. Sekiguchi T, Kuwasako K, Ogasawara M, Takahashi H, Matsubara S, Osugi T,  
1034 Muramatsu I, Sasayama Y, Suzuki N, Satake H: **Evidence for Conservation of the**  
1035 **Calcitonin Superfamily and Activity-regulating Mechanisms in the Basal**  
1036 **Chordate *Branchiostoma floridae*: INSIGHTS INTO THE MOLECULAR AND**  
1037 **FUNCTIONAL EVOLUTION IN CHORDATES.** *J Biol Chem* 2016, **291(5):2345-**  
1038 **2356.**
- 1039 114. Amara SG, Jonas V, Rosenfeld MG, Ong ES, Evans RM: **Alternative RNA**  
1040 **processing in calcitonin gene expression generates mRNAs encoding different**  
1041 **polypeptide products.** *Nature* 1982, **298(5871):240-244.**
- 1042 115. McLatchie LM, Fraser NJ, Main MJ, Wise A, Brown J, Thompson N, Solari R, Lee  
1043 MG, Foord SM: **RAMPs regulate the transport and ligand specificity of the**  
1044 **calcitonin-receptor-like receptor.** *Nature* 1998, **393(6683):333-339.**
- 1045 116. Evans BN, Rosenblatt MI, Mnayer LO, Oliver KR, Dickerson IM: **CGRP-RCP, a**  
1046 **novel protein required for signal transduction at calcitonin gene-related peptide**  
1047 **and adrenomedullin receptors.** *J Biol Chem* 2000, **275(40):31438-31443.**
- 1048 117. Zandawala M, Paluzzi JP, Orchard I: **Isolation and characterization of the cDNA**  
1049 **encoding DH(31) in the kissing bug, *Rhodnius prolixus*.** *Mol Cell Endocrinol*  
1050 2011, **331(1):79-88.**
- 1051 118. Zandawala M: **Calcitonin-like diuretic hormones in insects.** *Insect Biochem Mol*  
1052 *Biol* 2012, **42(10):816-825.**
- 1053 119. Nakabayashi K, Matsumi H, Bhalla A, Bae J, Mosselman S, Hsu SY, Hsueh AJ:  
1054 **Thyrostimulin, a heterodimer of two new human glycoprotein hormone subunits,**  
1055 **activates the thyroid-stimulating hormone receptor.** *J Clin Invest* 2002,  
1056 **109(11):1445-1452.**
- 1057 120. Roch GJ, Sherwood NM: **Glycoprotein Hormones and Their Receptors Emerged**  
1058 **at the Origin of Metazoans.** *Genome Biol Evol* 2014, **6(6):1466-1479.**
- 1059 121. Sudo S, Kuwabara Y, Park JI, Hsu SY, Hsueh AJ: **Heterodimeric fly glycoprotein**  
1060 **hormone-alpha2 (GPA2) and glycoprotein hormone-beta5 (GPB5) activate fly**  
1061 **leucine-rich repeat-containing G protein-coupled receptor-1 (DLGR1) and**  
1062 **stimulation of human thyrotropin receptors by chimeric fly GPA2 and human**  
1063 **GPB5.** *Endocrinology* 2005, **146(8):3596-3604.**
- 1064 122. Rocco DA, Paluzzi JP: **Functional role of the heterodimeric glycoprotein**  
1065 **hormone, GPA2/GPB5, and its receptor, LGR1: An invertebrate perspective.**  
1066 *Gen Comp Endocrinol* 2016, **234:20-27.**
- 1067 123. Cahoreau C, Klett D, Combarnous Y: **Structure function relationships of**  
1068 **glycoprotein hormones and their subunits' ancestors.** *Front Endocrinol* 2015, **6.**
- 1069 124. Verleyen P, Huybrechts J, Baggerman G, Van Lommel A, De Loof A, Schoofs L:  
1070 **SIFamide is a highly conserved neuropeptide: a comparative study in different**  
1071 **insect species.** *Biochem Biophys Res Commun* 2004, **320(2):334-341.**

- 1072 125. Yasuda A, Yasuda-Kamatani Y, Nozaki M, Nakajima T: **Identification of**  
1073 **GYRKPPFNGSIFamide (crustacean-SIFamide) in the crayfish *Procambarus***  
1074 ***clarkii* by topological mass spectrometry analysis.** *Gen Comp Endocrinol* 2004,  
1075 **135(3):391-400.**
- 1076 126. Verleyen P, Huybrechts J, Schoofs L: **SIFamide illustrates the rapid evolution in**  
1077 **Arthropod neuropeptide research.** *Gen Comp Endocrinol* 2009, **162(1):27-35.**
- 1078 127. Wegener C, Gorbashov A: **Molecular evolution of neuropeptides in the genus**  
1079 ***Drosophila*.** *Genome Biol* 2008, **9(8):R131.**
- 1080 128. Brezina V, Bank B, Cropper EC, Rosen S, Vilim FS, Kupfermann I, Weiss KR: **Nine**  
1081 **members of the myomodulin family of peptide cotransmitters at the B16-ARC**  
1082 **neuromuscular junction of *Aplysia*.** *J Neurophysiol* 1995, **74(1):54-72.**
- 1083 129. Hewes RS, Snowdeal EC, 3rd, Saitoe M, Taghert PH: **Functional redundancy of**  
1084 **FMRFamide-related peptides at the *Drosophila* larval neuromuscular junction.** *J*  
1085 *Neurosci* 1998, **18(18):7138-7151.**
- 1086 130. Fujisawa Y, Furukawa Y, Ohta S, Ellis TA, Dembrow NC, Li L, Floyd PD, Sweedler  
1087 JV, Minakata H, Nakamaru K *et al*: **The *Aplysia* Mytilus inhibitory peptide-related**  
1088 **peptides: Identification, cloning, processing, distribution, and action.** *Journal of*  
1089 *Neuroscience* 1999, **19(21):9618-9634.**
- 1090 131. Lange AB, Bendena WG, Tobe SS: **The Effect of the 13 Dip-Allatostatins on**  
1091 **Myogenic and Induced Contractions of the Cockroach (*Diploptera punctata*)**  
1092 **Hindgut.** *J Insect Physiol* 1995, **41(7):581-588.**
- 1093 132. Criscuolo A, Gribaldo S: **BMGE (Block Mapping and Gathering with Entropy): a**  
1094 **new software for selection of phylogenetic informative regions from multiple**  
1095 **sequence alignments.** *BMC evolutionary biology* 2010, **10(1):1.**
- 1096



1097 **Figure captions**

1098 **Figure 1:** Bilaterian animal phylogeny. The diagram shows i). the phylogenetic position of  
1099 the phylum Echinodermata in the ambulacrarian clade of the deuterostomes and ii)  
1100 relationships between the five extant classes of echinoderms, which include the focal class for  
1101 this study – the Ophiuroidea (e.g. *Ophionotus victoriae*).

1102

1103 **Figure 2:** Eclosion hormone (EH)-type peptides and receptors in echinoderms A) Partial  
1104 multiple sequence alignment of eclosion hormone-type precursor sequences, excluding the N-  
1105 terminal signal peptide; B) Cluster analysis of arthropod EH precursors, echinoderm EH-like  
1106 precursors, arthropod ion transport peptides (ITPs) and vertebrate atrial natriuretic peptides  
1107 shows that echinoderm EH-like precursors are more closely related to arthropod EH than ITP  
1108 C) Phylogenetic analysis of membrane guanylate cyclase receptors shows that EH-like  
1109 receptors are found in echinoderms but are absent in vertebrates as seen for the EH-like  
1110 precursors. Species names: *Ophionotus victoriae* (Ovic), *Asterias rubens* (Arub),  
1111 *Strongylocentrotus purpuratus* (Spur), *Drosophila melanogaster* (Dmel), *Bombyx mori*  
1112 (Bmor) and *Pediculus humanus corporis* (Pcor).

1113

1114 **Figure 3:** Multiple sequence alignments of A) CCHamide-type and B) Neuropeptide-F/Y-  
1115 type peptides. Species names: *Ophionotus victoriae* (Ovic), *Asterias rubens* (Arub),  
1116 *Apostichopus japonicus* (Ajap), *Drosophila melanogaster* (Dmel), *Apis mellifera* (Amel),  
1117 *Lottia gigantea* (Lgig), *Aplysia californica* (Acal), *Homo sapiens* (Hsap), *Ophiopsila aranea*  
1118 (Oara), *Amphiura filiformis* (Afil), *Patiria miniata* (Pmin), *Saccoglossus kowalevskii* (Skow),  
1119 *Branchiostoma floridae* (Bflo) and *Daphnia pulex* (Dpul).

1120

1121 **Figure 4:** Summary of neuropeptide precursors identified in *Ophionotus victoriae*, *Amphiura*  
1122 *filiformis* and *Ophiopsila aranea*. Neuropeptide precursors are classified based on the type of  
1123 G-protein coupled receptor (GPCR) their constituent peptides are predicted to activate (see  
1124 Mirabeau and Joly, 2013). Some peptides bind to receptors other than GPCRs and these are  
1125 grouped with peptides where the receptor is unknown. Ophiuroids have neuropeptide  
1126 precursors from up to 32 families. The number of putative mature peptides derived from each  
1127 precursor has been indicated along with the presence of amidation and pyroglutamation.

1128

1129 **Figure 5:** Multiple sequence alignments of mature peptides belonging to selected  
1130 neuropeptide families. A) corazonin alignment; B) gonadotropin-releasing hormone (GnRH)  
1131 alignment; C) orexin alignment; D) luqin alignment; E) vasopressin/oxytocin (VP/OT)

1132 alignment; F) Ovnp18 alignment; G) melanin-concentrating hormone (MCH) alignment; H)  
1133 NP peptide alignment; D) pigment dispersing factor (PDF) alignment. Species names:  
1134 *Ophionotus victoriae* (Ovic), *Asterias rubens* (Arub), *Strongylocentrotus purpuratus* (Spur),  
1135 *Apostichopus japonicus* (Ajap), *Saccoglossus kowalevskii* (Skow), *Branchiostoma floridae*  
1136 (Bflo), *Anopheles gambiae* (Agam), *Daphnia pulex* (Dpul), *Strigamia maritima* (Smar),  
1137 *Lottia gigantea* (Lgig) and *Homo sapiens* (Hsap).

1138

1139 **Figure 6:** Alignments of neuropeptides derived from precursors that exist in multiple forms  
1140 in ophiuroids. A) thyrotropin-releasing hormone (TRH) alignment; B) cholecystokinin  
1141 alignment; C) somatostatin alignment; D) corticotropin-releasing hormone (CRH) alignment.  
1142 Species names: *Ophionotus victoriae* (Ovic), *Asterias rubens* (Arub), *Strongylocentrotus*  
1143 *purpuratus* (Spur), *Apostichopus japonicus* (Ajap), *Branchiostoma floridae* (Bflo), *Homo*  
1144 *sapiens* (Hsap), *Drosophila melanogaster* (Dmel) and *Lottia gigantea* (Lgig).

1145

1146 **Figure 7:** Comparative analysis of ophiuroid tachykinin, kisspeptin and calcitonin-type  
1147 precursors and neuropeptides. A) Alignment of tachykinin-type peptides in *O. victoriae*  
1148 (Ophiuroidea) and *A. rubens* (Asteroidea); B) Schematic diagrams of the *O. victoriae* and *A.*  
1149 *rubens* tachykinin precursors showing the location of the signal peptide (SP) and predicted  
1150 neuropeptides (labelled 1 to 4); C) Alignments of the long and short forms of kisspeptin-type  
1151 neuropeptides in *O. victoriae*, *A. rubens* and *S. purpuratus* (Echinoidea) D) Schematic  
1152 diagrams of the *O. victoriae* and *A. rubens* kisspeptin precursors showing the locations of the  
1153 SP, short and long orthocopies and cysteine (C) residues; E) Alignment of calcitonin-type  
1154 peptides from *O. victoriae*, *A. rubens*, *S. purpuratus* and *A. japonicus* (Holothuroidea); F)  
1155 Predicted alternative splicing of the calcitonin gene in ophiuroids, with the location of the SP  
1156 and neuropeptides (CT1 and CT2) labelled. Species names: *Ophionotus victoriae* (Ovic),  
1157 *Asterias rubens* (Arub), *Strongylocentrotus purpuratus* (Spur) and *Apostichopus japonicus*  
1158 (Ajap).

1159

1160 **Figure 8:** Comparison of neuropeptide copy numbers across the Ophiuroidea for precursors  
1161 comprising multiple copies of neuropeptides. Neuropeptide precursors were mined from 52  
1162 ophiuroid transcriptomes, with the phylogeny adapted from O'Hara et al. (2014) [12].  
1163 Am\_laud: *Amphiophiura laudata*, Am\_spat: *Amphiophiura spatulifera*, Am\_cipu:  
1164 *Amphioplus cippus*, Am\_cten: *Amphioplus ctenacantha*, Am\_squa: *Amphipholis squamata*,  
1165 Am\_cons1: *Amphiura constricta* 1, Am\_cons2: *Amphiura constricta* 2, As\_love: *Asteronyx*  
1166 *loveni*, As\_bidw: *Asteroschema bidwillae*, As\_tubi: *Asteroschema tubiferum*, Ba\_hero:

1167 *Bathypectinura heros*, Cl\_cana: *Clarkcoma canaliculata*, Gl\_sp\_no: *Glaciacantha sp nov*,  
1168 Go\_pust: *Gorgonocephalus pustulatum*, Mi\_grac: *Microphiopholis gracillima*, Op\_fune:  
1169 *Ophiacantha funebris*, Op\_abys: *Ophiactis abyssicola*, Op\_resi: *Ophiactis resiliens*, Op\_savi:  
1170 *Ophiactis savignyi*, Op\_vall: *Ophiernus vallincola*, Op\_pilo: *Ophiocentrus pilosus*,  
1171 Op\_wend: *Ophiocoma wendtii*, Op\_oedi: *Ophiocreas oedipus*, Op\_tube: *Ophiocypris*  
1172 *tuberculosis*, Op\_appr: *Ophioderma appressum*, Op\_bisc: *Ophiolepis biscalata*, Op\_impr:  
1173 *Ophiolepis impressa*, Op\_brev: *Ophioleuce brevispinum*, Op\_perf: *Ophiolimna perfida*,  
1174 Op\_prol: *Ophiologimus prolifer*, Op\_obst: *Ophiomoeris obstructa*, Op\_lyma: *Ophiomusium*  
1175 *lymani*, Op\_aust: *Ophiomyxa australis*, Op\_vivi: *Ophiomyxa sp cf vivipara*, Op\_fasc:  
1176 *Ophionereis fasciata*, Op\_reti: *Ophionereis reticulata*, Op\_scha: *Ophionereis schayeri*,  
1177 Op\_cyli: *Ophiopeza cylindrica*, Op\_filo: *Ophiophragmus filograneus*, Op\_wurd:  
1178 *Ophiophragmus wurdemanii*, Op\_liod: *Ophiophrura liodisca*, Op\_john: *Ophiophycis johni*,  
1179 Op\_lame: *Ophioplax lamellosa*, Op\_iner: *Ophiopleura inermis*, Op\_plic: *Ophioplinthaca*  
1180 *plicata*, Op\_bisp: *Ophioplocus bispinosus*, Op\_macu: *Ophiopsammus maculata*, Op\_angu:  
1181 *Ophiothrix angulata*, Op\_caes: *Ophiothrix caespitosa*, Op\_exim\_1: *Ophiotreta eximia 1*,  
1182 Op\_exim\_2: *Ophiotreta eximia 2*, Op\_sp\_no: *Ophiura sp nov*.

1183

1184 **Figure 9:** A partial multiple sequence alignment of ophiuroid thyrotropin-releasing hormone  
1185 (TRH) precursors showing clade-specific gain/loss of neuropeptide copies. Mono- and di-  
1186 basic cleavage sites are highlighted in green, mature peptides in red with the glycine residue  
1187 for amidation in pink. Species have been grouped and coloured (clade A in purple, clade B in  
1188 blue and clade C in orange) based on the phylogeny determined by O'Hara et al. (2014) [12].

1189

1190 **Figure 10:** A partial multiple sequence alignment of ophiuroid F-type SALMFamide  
1191 precursors showing clade-specific gain/loss of neuropeptide copies. Di-basic cleavage sites  
1192 are highlighted in green, mature peptides in red with the glycine residue for amidation in  
1193 pink. Species have been grouped and coloured (clade A in purple, clade B in blue and clade C  
1194 in orange) based on the phylogeny determined by O'Hara et al. (2014) [12].

1195

### 1196 **Supplementary files**

1197 **Figure S1:** Alignment and phylogenetic analysis of nucleobindins (NUCB). A) Partial  
1198 sequence alignment (excludes the signal peptide) of NUCB precursors. The locations of  
1199 *Homo sapiens* nesfatin-1, 2 and 3 are indicated. A dibasic cleavage site in *O. victoriae*  
1200 nesfatin-1 is marked in red. B) Phylogenetic analysis of NUCB precursors. Species names:  
1201 *Ophionotus victoriae* (Ovic), *Amphiura filiformis* (Afil), *Ophiopsila aranea* (Oara),

1202 *Apostichopus japonicus* (Ajap), *Strongylocentrotus purpuratus* (Spur), *Homo sapiens* (Hsap),  
1203 *Mus musculus* (Mmus) and *Drosophila melanogaster* (Dmel).

1204

1205 **Figure S2:** *Ophionotus victoriae* neuropeptide precursor repertoire.

1206

1207 **Figure S3:** *Amphiura filiformis* neuropeptide precursor repertoire.

1208

1209 **Figure S4:** *Ophiopsila aranea* neuropeptide precursor repertoire.

1210

1211 **Figure S5:** Partial multiple sequence alignments of echinoderm representatives of A)  
1212 glycoprotein alpha 2 (GPA2)-type subunits and B) glycoprotein beta 5 (GPB5)-type subunits.  
1213 Species names: *Ophionotus victoriae* (Ovic), *Asterias rubens* (Arub), *Strongylocentrotus*  
1214 *purpuratus* (Spur) and *Apostichopus japonicus* (Ajap).

1215

1216 **Figure S6:** Partial multiple sequence alignments of echinoderm representatives of large  
1217 protein hormones. A) insulin/insulin-like growth factor; B) relaxin-like peptide; C) bursicon  
1218 (bursicon alpha); D) partner of bursicon (bursicon beta). Species names: *Ophionotus victoriae*  
1219 (Ovic), *Asterias rubens* (Arub), *Strongylocentrotus purpuratus* (Spur) and *Apostichopus*  
1220 *japonicus* (Ajap).

1221

1222 **Figure S7:** Multiple sequence alignment of echinoderm pedal peptides. Species names:  
1223 *Ophionotus victoriae* (Ovic), *Asterias rubens* (Arub), *Strongylocentrotus purpuratus* (Spur)  
1224 and *Apostichopus japonicus* (Ajap).

1225

1226 **Figure S8:** Multiple sequence alignments of echinoderm neuropeptide families. A) F-type  
1227 SALMFamide alignment; B) L-type SALMFamide alignment; C) AN peptide. Species  
1228 names: *Ophionotus victoriae* (Ovic), *Asterias rubens* (Arub), *Strongylocentrotus purpuratus*  
1229 (Spur) and *Apostichopus japonicus* (Ajap).

1230

1231 **Figure S9:** Multiple sequence alignment of predicted peptides derived from neuropeptide  
1232 precursor 27 in *Ophionotus victoriae* (Ovic), *Amphiura filiformis* (Afil), *Ophiopsila aranea*  
1233 (Oara) and *Apostichopus japonicus* (Ajap).

1234

1235 **Figure S10:** Multiple sequence alignments of neuropeptide precursors used to generate  
1236 Figure 8.

1237

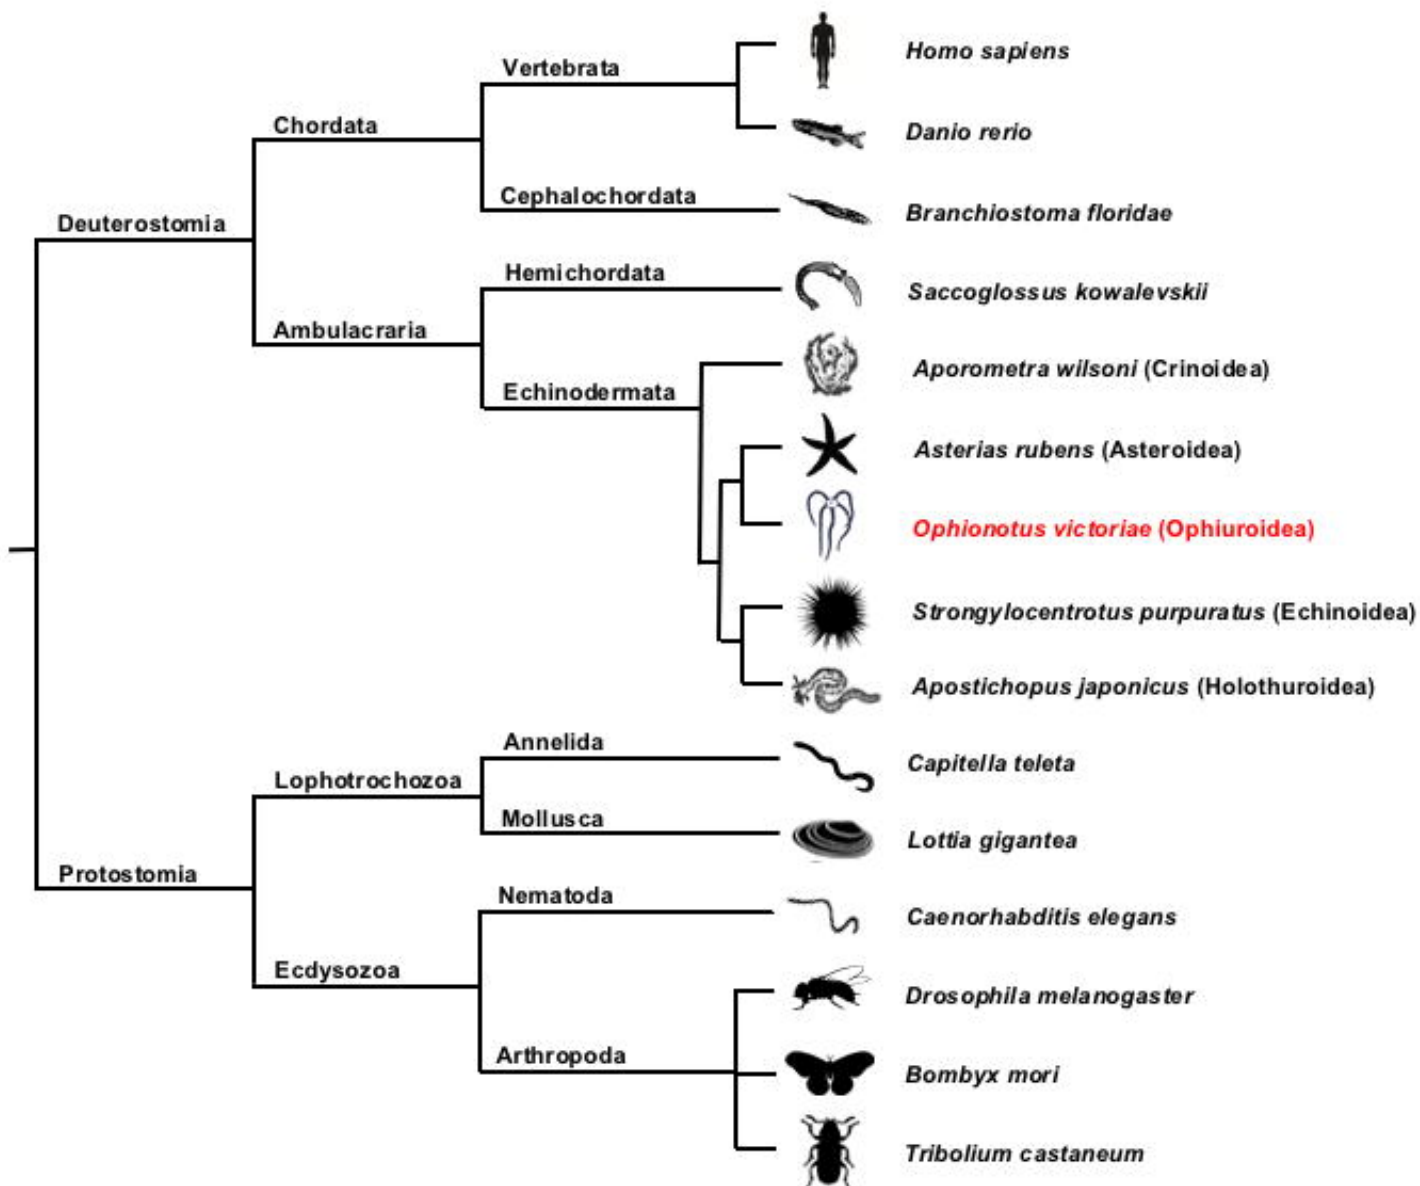

**A**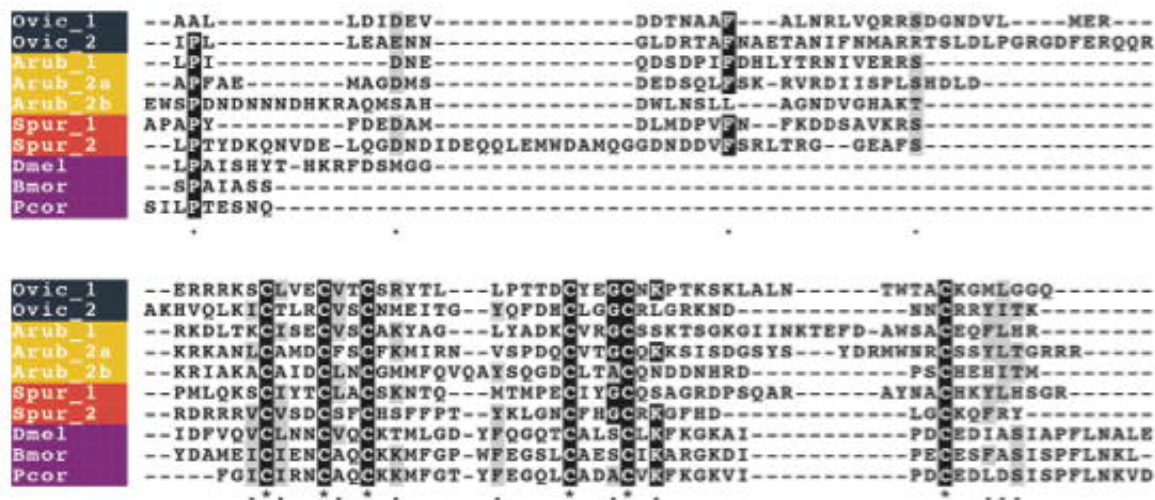**B**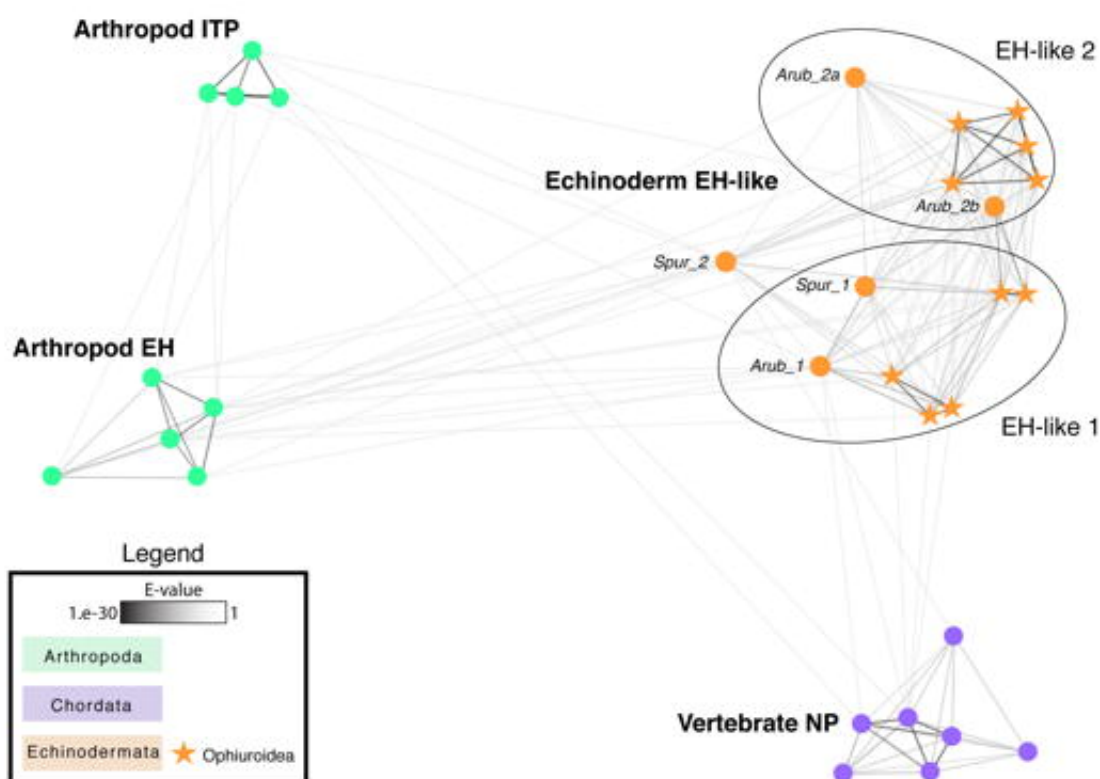**C**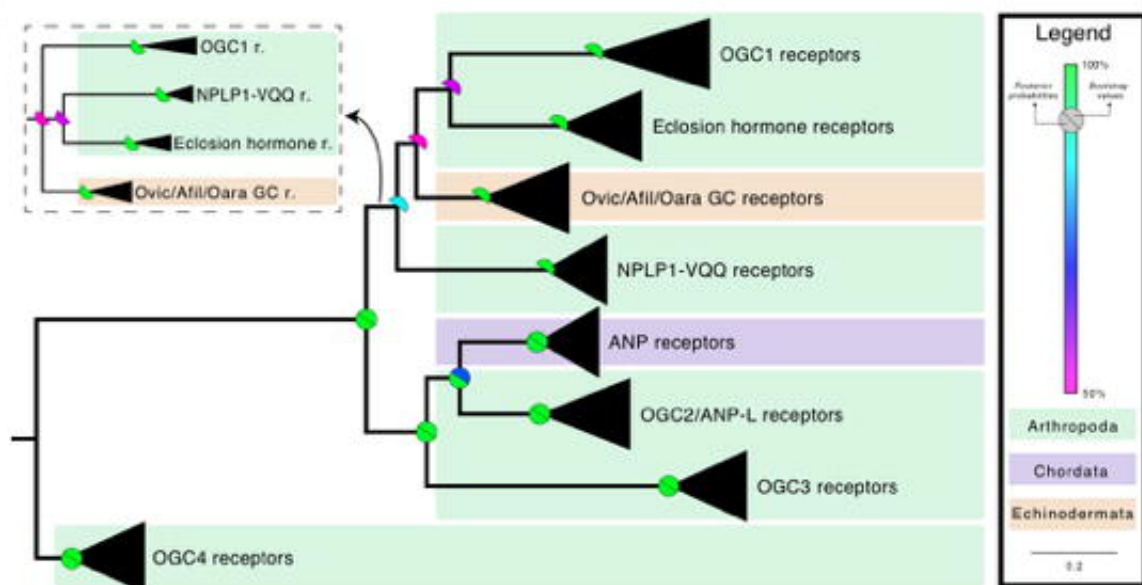

A

## CCHamide

|           |      |                     |                     |
|-----------|------|---------------------|---------------------|
| Ovic1     | TN-H | <b>C</b> CKGRL--PKF | <b>C</b> FLHPa      |
| Ovic2     | RG-I | <b>C</b> S D---PLA  | <b>C</b> GAAFa      |
| Arub      | SR-R | <b>C</b> S ---VKG   | <b>C</b> MVHFa      |
| Ajap      | KS-A | <b>C</b> SNRH--PKL  | <b>C</b> ILHPa      |
| Dmel_CCH1 | ---  | <b>C</b> SLEY---GH  | <b>C</b> SWGAAHa    |
| Dmel_CCH2 | ---  | <b>C</b> QAY---GH   | <b>C</b> VCYGGHa    |
| Amel_CCH1 | ---  | <b>C</b> LSY---GH   | <b>C</b> SWGAAHa    |
| Amel_CCH2 | ---  | <b>C</b> S AF---GH  | <b>C</b> S FGGHa    |
| Lgig_GGNG | ---  | <b>C</b> S GRWA-IH  | <b>C</b> AFGGNa     |
| Acal_L11  | PRID | <b>C</b> TRFVF-AP   | <b>C</b> ACRGVSA    |
| Amel_L11  | ESVN | <b>C</b> ELYPF-HHT  | <b>C</b> CRGTMS     |
| Hsap_EDN3 | ---  | <b>C</b> TCFTYKDKE  | <b>C</b> VYYCHLDIIW |

\* . . \* . .

B

## Neuropeptide-F/Y

|      |                     |               |               |             |                 |
|------|---------------------|---------------|---------------|-------------|-----------------|
| Oara | -----               | ATTGD         | <b>K</b> ALDA | ILSGQY-RSH  | <b>L</b> RYa    |
| Afil | -----               | ATTGD         | <b>K</b> ALDA | ILSGQY-RHHL | <b>L</b> RYa    |
| Arub | -----               | pQDRS         | <b>K</b> AMQA | EERTGQLRRL  | <b>N</b> PRFa   |
| Pmin | -----               | pQSDMRD       | <b>K</b> AMQA | ITTGQINRNH  | <b>A</b> RYa    |
| Skow | DASDYQAPTAPSRGASLA  | EWDRY         | <b>L</b> REL  | SLYROYADI   | <b>Q</b> RFa    |
| Bflo | -----               | pQEEEDVEAPEEG | <b>K</b> YK   | NLANYLRL    | <b>L</b> TRQRYa |
| Hsap | ---YPSKPDNPGEDAPAED | MARYYS        | <b>A</b> LRHY | INLITRQ     | <b>R</b> RYa    |
| Dmel | ---SNSRPPRKNDVNTMAD | AYKFL         | <b>Q</b> DLDT | YYGDRARV    | <b>R</b> RFa    |
| Dpul | DGGDVMSGGEGGEMTAM   | ADAIKY        | <b>L</b> QGL  | RRYDNSLVR   | <b>P</b> RFa    |
| Lgig | pQDSMLAPPDRPSEFRSP  | DELRRY        | <b>L</b> KAL  | NEYAIVGR    | <b>P</b> RFa    |

. . . . . \* . \*

| Receptor type      | Neuropeptide family                    | <i>O. victoriae</i>                      |                    |          |                | <i>A. filiformis</i> |                    |          |                | <i>O. aranea</i> |                    |          |                |
|--------------------|----------------------------------------|------------------------------------------|--------------------|----------|----------------|----------------------|--------------------|----------|----------------|------------------|--------------------|----------|----------------|
|                    |                                        | Precursor                                | Predicted peptides | Amidated | Pyroglutamated | Precursor            | Predicted peptides | Amidated | Pyroglutamated | Precursor        | Predicted peptides | Amidated | Pyroglutamated |
| Rhodopsin $\beta$  | 1                                      | <i>CCHamide-like 1</i>                   | 1                  |          |                |                      | 1                  |          |                | 1                |                    |          |                |
|                    |                                        | <i>CCHamide-like 2</i>                   | 1                  |          |                |                      | 1                  |          |                | 1                |                    |          |                |
|                    | 2                                      | <i>Cholecystokinin 1</i>                 | 3                  |          |                |                      | 3                  |          |                | 1*               |                    |          |                |
|                    | 3                                      | <i>Corazonin</i>                         | 1                  |          |                |                      | 1                  |          |                | 1                |                    |          |                |
|                    | 4                                      | <i>Gonadotropin-releasing hormone</i>    | 1                  |          |                |                      | 1                  |          |                | 1                |                    |          |                |
|                    | 5                                      | <i>Luqin</i>                             | 1                  |          |                |                      | 1                  |          |                | 1                |                    |          |                |
|                    | 6                                      | <i>Neuropeptide-F/Y 1</i>                | 1*                 |          |                |                      | 1                  |          |                | 1                |                    |          |                |
|                    |                                        | <i>Neuropeptide-F/Y 2</i>                |                    |          |                |                      | 1                  |          |                |                  |                    |          |                |
|                    | 7                                      | <i>NG peptide / Neuropeptide-S</i>       | 2                  |          |                |                      | 2                  |          |                | 2                |                    |          |                |
|                    | 8                                      | <i>Orexin 1</i>                          | 1                  |          |                |                      | 1                  |          |                | 1                |                    |          |                |
|                    |                                        | <i>Orexin 2</i>                          | 1                  |          |                |                      | 1                  |          |                | 1                |                    |          |                |
| 9                  | <i>Tachykinin</i>                      | 4                                        |                    |          |                | 4                    |                    |          | 4              |                  |                    |          |                |
| 10                 | <i>Thyrotropin-releasing hormone 1</i> | 21                                       |                    |          |                | 14*                  |                    |          | 17             |                  |                    |          |                |
|                    | <i>Thyrotropin-releasing hormone 2</i> | 4                                        |                    |          |                | 4*                   |                    |          |                |                  |                    |          |                |
| 11                 | <i>Vasopressin / Oxytocin</i>          | 1                                        |                    |          |                | 1                    |                    |          | 1              |                  |                    |          |                |
| Rhodopsin $\gamma$ | 12                                     | <i>Kisspeptin</i>                        | 2                  |          |                |                      | 1*                 |          |                | 1                |                    |          |                |
|                    | 13                                     | <i>Melanin-concentrating hormone</i>     | 1                  |          |                |                      | 1                  |          |                | 1                |                    |          |                |
|                    | 14                                     | <i>Somatostatin 1</i>                    | 1                  |          |                |                      | 1                  |          |                |                  |                    |          |                |
|                    |                                        | <i>Somatostatin 2</i>                    | 1                  |          |                |                      | 1                  |          |                | 1                |                    |          |                |
| Rhodopsin $\delta$ | 15                                     | <i>Bursicon alpha</i>                    | 1                  |          |                |                      |                    |          |                |                  |                    |          |                |
|                    | 16                                     | <i>Bursicon beta</i>                     | 1                  |          |                |                      | 1                  |          |                |                  |                    |          |                |
|                    | 17                                     | <i>Glycoprotein hormone alpha 2.1</i>    |                    |          |                |                      | 1                  |          |                | 1                |                    |          |                |
|                    |                                        | <i>Glycoprotein hormone alpha 2.2</i>    | 1                  |          |                |                      | 1                  |          |                | 1                |                    |          |                |
|                    | 18                                     | <i>Glycoprotein hormone beta 5.1</i>     | 1                  |          |                |                      | 1                  |          |                |                  |                    |          |                |
|                    | <i>Glycoprotein hormone beta 5.2</i>   | 1                                        |                    |          |                | 1                    |                    |          |                |                  |                    |          |                |
| 19                 | <i>Relaxin-like peptide</i>            | a                                        |                    |          |                | a                    |                    |          | a              |                  |                    |          |                |
| Secretin           | 20                                     | <i>Calcitonin</i>                        | 2                  |          |                |                      | 1/2                |          |                | 1/2              |                    |          |                |
|                    | 21                                     | <i>Corticotropin-releasing hormone 1</i> | 1                  |          |                |                      | 1                  |          |                | 1                |                    |          |                |
|                    |                                        | <i>Corticotropin-releasing hormone 2</i> | 1                  |          |                |                      | 1                  |          |                | 1                |                    |          |                |
|                    |                                        | <i>Corticotropin-releasing hormone 3</i> | 1*                 |          |                |                      | 1                  |          |                |                  |                    |          |                |
|                    |                                        | <i>Corticotropin-releasing hormone 4</i> | 1*                 |          |                |                      | 1*                 |          |                |                  |                    |          |                |
| 22                 | <i>Pigment-dispersing factor</i>       | 2                                        |                    |          |                | 2                    |                    |          | 2              |                  |                    |          |                |
| Unknown / Others   | 23                                     | <i>AN peptide</i>                        |                    |          |                |                      | 5*                 |          |                | 7                |                    |          |                |
|                    | 24                                     | <i>Eclosion hormone 1.1</i>              |                    |          |                |                      | 1                  |          |                | 1                |                    |          |                |
|                    |                                        | <i>Eclosion hormone 1.2</i>              | 1                  |          |                |                      | 1                  |          |                | 1                |                    |          |                |
|                    |                                        | <i>Eclosion hormone 2.1</i>              |                    |          |                |                      | 1                  |          |                | 1                |                    |          |                |
|                    |                                        | <i>Eclosion hormone 2.2</i>              | 1                  |          |                |                      | 1                  |          |                | 1                |                    |          |                |
|                    | 25                                     | <i>Insulin-like peptide</i>              | a                  |          |                |                      | a                  |          |                |                  |                    |          |                |
|                    | 26                                     | <i>Nucleobindin / Nefastin</i>           | b                  |          |                |                      | b                  |          |                | b                |                    |          |                |
|                    | 27                                     | <i>Pedal peptide 1</i>                   | 6                  |          |                |                      | c                  |          |                | c                |                    |          |                |
|                    |                                        | <i>Pedal peptide 2</i>                   | 4*                 |          |                |                      |                    |          |                | 1*               |                    |          |                |
|                    |                                        | <i>Pedal peptide 3</i>                   | 8*                 |          |                |                      | c                  |          |                | c                |                    |          |                |
| 28                 | <i>SALMFamide (L-type)</i>             | 4                                        |                    |          |                | 4                    |                    |          | 4*             |                  |                    |          |                |
| 29                 | <i>SALMFamide (F-type)</i>             | 12                                       |                    |          |                | 11                   |                    |          | 11             |                  |                    |          |                |
| 30                 | <i>Neuropeptide precursor 18</i>       | 4                                        |                    |          |                | 2*                   |                    |          | 4              |                  |                    |          |                |
| 31                 | <i>Neuropeptide precursor 26</i>       | 7                                        |                    |          |                | 8                    |                    |          | 8              |                  |                    |          |                |
| 32                 | <i>Neuropeptide precursor 27</i>       | 2                                        |                    |          |                | 2                    |                    |          | 2              |                  |                    |          |                |

■ Present

▨ Partial / some mature peptides

□ Absent

▤ Cannot be determined

a Heterodimer of A-chain and B-chain

b Number of mature peptides unknown

c Multiple partial precursors

bioRxiv preprint doi: <https://doi.org/10.1101/129783>; this version posted May 20, 2017. The copyright holder for this preprint (which was not certified by peer review) is the author/funder, who has granted bioRxiv a license to display the preprint in perpetuity. It is made available under aCC-BY-NC-ND 4.0 International license.



**A Corazonin**

|      |                   |
|------|-------------------|
| Ovic | HNTFSFKGSNRWNA-a  |
| Arub | HNTFTMGGQNRWKAGa  |
| Spur | HNTFSFKGRSRYFP-a  |
| Skow | pQPHFSLKDRYRWKP-a |
| Bflo | -----FTYTHTW---a  |
| Agam | pQ---TFQYSRGWTN-a |
| Dpul | pQ---TFQYSRGWTN-a |
| Smar | pQ---TFQYSKGWEP-a |
| Lgig | pQ---HYHFSNGWKS-a |

\*     \*     \*     \*     \*

**B GnRH**

|           |                 |
|-----------|-----------------|
| Ovic_GnRH | pQLHSR-MRWEPGA  |
| Arub_GnRH | pQIHYNKPGWGPGA  |
| Spur_GnRH | pQVHHRFSGWRPGA  |
| Hsap_GnRH | pQ-HWS-YGLRPGA  |
| Agam_ACP  | pQVTFSS-RDWN-Aa |
| Smar_ACP  | pQVTFSS-RDWTPAa |
| Agam_AKH  | pQLTFT-PAW---a  |
| Dpul_AKH  | pQVNFSS-TSW---a |
| Smar_AKH  | pQINFSS-PGWG-Qa |
| Lgig_AKH  | pQIHFS-PTWG-Sa  |

\*     \*     \*     \*

**C Orexin**

|        |                                            |
|--------|--------------------------------------------|
| Ovic_1 | ---DRA-CCRLTTGC-QLRTDCLCVAKEVMCRDPSVGLLNMa |
| Ovic_2 | --pQKQSCCRVK-GC-SIPDCDCPLKQELCKDVTKGILSMa  |
| Arub_1 | SNADSA-CCARTFRC-NLRSDCTCMVREILCRDPSEGLNSa  |
| Arub_2 | ---NA-CC-RGT-CHDIPPGCNCPYKSYLCGELN--ALTMa  |
| Spur_1 | ---DRA-CCKRTVGC-NLRSDCTCRIREITCTDPSLGLQNYa |
| Spur_2 | --pQSP-CCRRAKGC-SFPPGCHCPLKMSFCGDPSRGLQIVa |

\*     \*     \*     \*     \*     \*     \*     \*     \*     \*     \*     \*     \*

**D Luqin**

|      |                   |
|------|-------------------|
| Ovic | pQGFNRDGPAAKFMRWa |
| Arub | E--EKTRFPKFMRWa   |
| Spur | -----GKPHKFMRWa   |
| Ajap | -----KPYKFMRWa    |

\*     \*     \*     \*     \*     \*

**E VP/OT**

|      |            |
|------|------------|
| Ovic | CLVSDCPEGA |
| Arub | CLVQDCPEGA |
| Spur | CFISNCPKGA |

\*     \*     \*     \*     \*

**F Ovnp18**

|          |       |
|----------|-------|
| Ovic_1-4 | LFWVD |
| Arub_1   | LFWVD |
| Spur_1   | LFWVD |
| Ajap_1   | LFWID |

\*     \*     \*     \*

**G MCH**

|      |                                  |
|------|----------------------------------|
| Ovic | SSSPNDIRRRYSVCYDPIKLRWRRCRGMGSKT |
| Arub | -DRPNR-REVTYCMDWIHNTWRPCRGKRKAG- |
| Spur | -SRSG--RKLRF CMDVIRNTWRLCRNTRS-  |

\*     \*     \*     \*     \*     \*     \*     \*     \*

**H NG peptides**

|          |        |
|----------|--------|
| Ovic_1   | NGFFFa |
| Ovic_2   | NGFFYa |
| Arub_1-2 | NGFFYa |
| Spur_1-2 | NGFFJa |
| Ajap_1-5 | NGIWyA |

\*     \*     \*     \*

**I PDF**

|        |                                          |
|--------|------------------------------------------|
| Ovic_1 | -IADNDFAQMRSIADRKNEAIAFRNL---LSQILKE-Qa  |
| Ovic_2 | -LSONDFSQLRs--NVLDQEL-TKQL---IARFLSE-Aa  |
| Arub_1 | -LGDNDFFQATY--NDAQARQRQVLSYSLDDRMASV-a   |
| Arub_2 | -NFDEEDVYHQEG---LDNEF-VRRLL---MAKYFDGVA- |
| Spur_1 | -IADNDFAAMRH--QERSNSMRRTRLQLQAMNEMLAK-Aa |
| Spur_2 | SLAQNDYMMVRQ--DLANGRL-YRSL---MDRMLSE-Aa  |
| Ajap_1 | -ISDNDFAQLRG--PHISQFARNKAFLNRRORNALEYGQ- |
| Ajap_2 | NLSONDVSQSRa--AYMNQML-AYRM---MSQLLGE-Aa  |

\*     \*     \*     \*     \*     \*     \*     \*     \*

### A TRH

|             |        |
|-------------|--------|
| Ovic1_1     | pQFSPA |
| Ovic1_2-17  | pQFSAA |
| Ovic1_18-21 | pQFAAA |
| Ovic2_3-4   | pQGPRa |
| Arub_1-12   | pQWYTa |
| Spur_1-10   | pQYPGa |
| Spur_11     | pQFPAA |
| Spur_12-16  | pQWPGa |
| Spur_17     | pQFPGa |
| Ajap_1-10   | pQYFAa |
| Ajap_11     | pQLPGA |
| Ajap_12-15  | pQFFQa |
| Ajap_16     | pQHfVa |
| Ajap_17     | pQHFAa |
| Ajap_18     | pQHFLa |

\* . \*

### B Cholecystinin

|         |                 |
|---------|-----------------|
| Ovic1_1 | ----SKDYGWGMaFa |
| Ovic1_2 | ----NKDYGWGMaFa |
| Ovic1_3 | -----NEYGWGHMFa |
| Ovic2   | ----SLDYGFGMGFa |
| Arub1_1 | ----VDDYGHGLFWa |
| Arub1_2 | --GGDDQYGFGLFFa |
| Spur1_1 | -----DYGHGMFFa  |
| Spur1_2 | ----PDDYNWGMWFa |
| Spur1_3 | --DKADLYGWGGFFa |
| Spur2   | DAGPHAWYGTGM-Fa |
| Ajap1_1 | ---MNGWY-TGM-Fa |
| Ajap1_2 | --NIPQTYLSGDYFa |

. \* . \* . \*

### C Somatostatin

|           |                         |
|-----------|-------------------------|
| Ovic_1    | ---GKC-VGRFVP---YM-MNC- |
| Ovic_2    | ---PGC-VYDIWKGRGLS--RCT |
| Arub      | ----KC-IGRFQP---FS-MPC- |
| Spur_1    | ---GKC-MGRFGP---YM-LNC- |
| Spur_2    | PARKIC-INDIWKGRGGG-LRCN |
| Ajap_2    | YNNRWCNLVDIWKGGGNSHRCR  |
| Bflo      | --AKGC-ARFYWKMPATA-MSC- |
| Hsap_SMS  | ---AGC-KNFFWK---TF-TSC- |
| Hsap_CORT | -DRMPC-RNFFWK---TF-SSC- |

\* . . . . \*

### D CRH

|           |                                                      |
|-----------|------------------------------------------------------|
| Ovic_1    | -TGSPIALNPLGVLDILRS--TIDNDRRR-QQMSEAAAMNSELFTTRVa--  |
| Ovic_2    | -pQMNLDLF---TTFSVLRE--AFESAKNE-RDRASALAANGRLFAAGa--  |
| Ovic_3    | -pQMTVDPF---TTMQLRD--LHQTAEKE-RQRQKAIDINGRLFAAGa--   |
| Ovic_4    | -DNFEFGLF---TSLDILRD--AFQSAKSE-RERADALAANEDLLAAa--   |
| Arub      | --pQGLSVS---PIFPIQIRI-LNAIERDR-QDQVDQAEANQGLFQIAa--  |
| Hsap_CRH  | SEPPISLD---LTFHLLRE--VLEMARAE--QLAQQAHSNRKLMETIa--   |
| Hsap_UCN1 | -DNPSLSID---LTFHLLRT--LLELARTQ--SQRERAEQNRIFDSVa--   |
| Hsap_UCN2 | ---IVLSLD---VPIGLLOI--LLEQARAR--AAREQATTNARILARVGHc  |
| Hsap_UCN3 | ---FTLSLD---VPTNIMNL--LFNIAKAK--NLRAQAAANAHLMQAIA--  |
| Dmel_DH44 | -NKPSLSIV---NPLDVLRRQLLEIARRQMKENSQVELNRAILKNVa--    |
| Lgig_ELH1 | ---SRLSIN---QELSLAN--LLVLRNK-RREAQKTKLRSKL-LSIa--    |
| Lgig_ELH2 | --AGRLSIN---GALSSLAD--LLVSENQR-RDRLESMELRQRL-QYL a-- |

. . . . . \* . . . . \*

**A****Tachykinin**

|        |                  |
|--------|------------------|
| Ovic_1 | KN---NVF-SAGLFa  |
| Ovic_2 | NGW--SQGQOSGLFa  |
| Ovic_3 | pQRW--NQNOQPGLFa |
| Ovic_4 | SSG-QHVFRSGGLFa  |
| Arub_1 | pQLW---ANQOSGLFa |
| Arub_2 | GGGVPHVFOSGGLFa  |
|        | *      *.*       |

**B**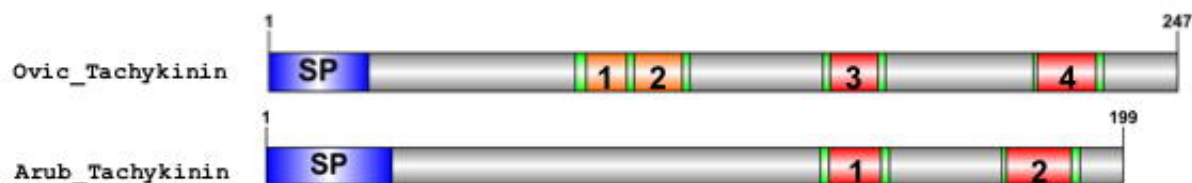**C****Kisspeptin (long)****Kisspeptin (short)**

|        |      |        |        |        |         |         |      |        |         |      |      |       |      |      |
|--------|------|--------|--------|--------|---------|---------|------|--------|---------|------|------|-------|------|------|
| Ovic_1 | pQGS | TACMNV | -CRMI  | RGRPR  | VNANAG  | SRAL    | LPFa | Ovic_2 | GRGR    | PRTR | RGSP | NGHP  | QQHK | LPFa |
| Arub_1 | SG-- | RCRSG  | TKCIM  | RG---  | PNPNT   | ASRV    | LPFa | Arub_2 | GRGPP   | KNSR | RARG | GRTL  | ---  | LPFa |
| Spur_1 | S--- | RCRGR  | QCRNV  | GGL--- | LNPAN   | LRPL    | LPFa | Spur_2 | GRTKN   | RIR- | ---  | ERVPH | F    | LPFa |
|        | ..   | .*     | *..... | .....* | *.*.*.* | *.*.*.* | **** |        | **..... | .    | ..   | .*    | **** |      |

**D**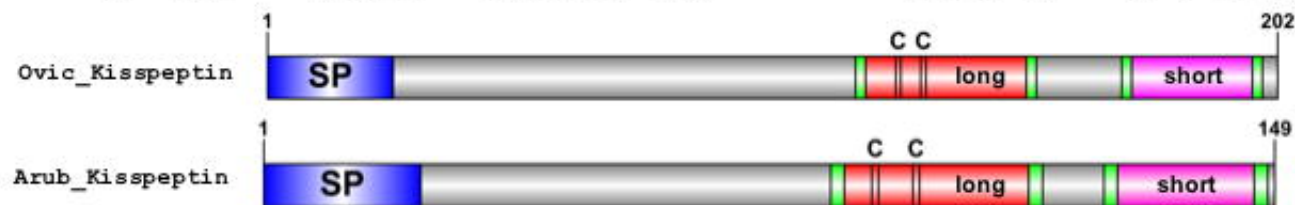**E****Calcitonin**

|        |                                                         |
|--------|---------------------------------------------------------|
| Ovic_1 | S-GNGGCAG-FTGCAQLAAGQNALRNFMSNRASLFTGASGPa              |
| Ovic_2 | N-GNGGCAG-FTGCAQLAAGQSALQAMIHSGRASLFGSGGPa              |
| Arub   | NGESRGC SG-FGGCGVLTIGHNAAMRMLAESNSP-F-GASGPa            |
| Spur   | ---SKGCCS-FSGCMQMEVAKNRVAALLRNSNAHLF-GLNGPa             |
| Ajap_1 | ----SCSNKFAGCAHMKVANAVLKQNSRGQQQFKF-GSAGPa              |
| Ajap_2 | --RVGGCGD-FSGCASLKAGRDLVRAML RPSK---F-GSGGPa            |
|        | *.*      *.*.*      *      *      *.*      *.*      *** |

**F****Putative calcitonin splicing in Ophiuroidea**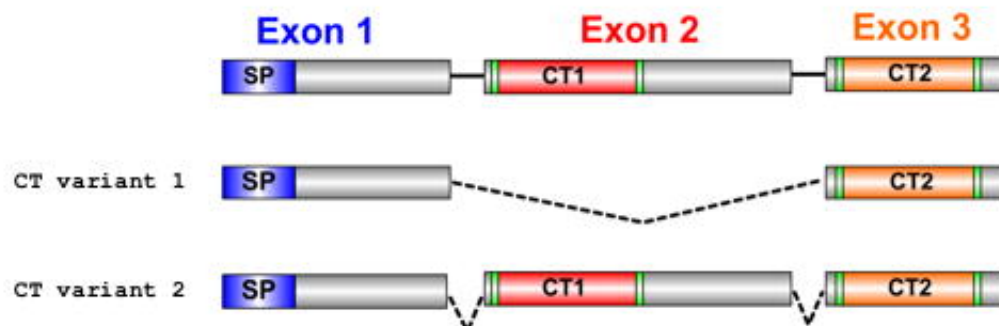

Ophiuroidea

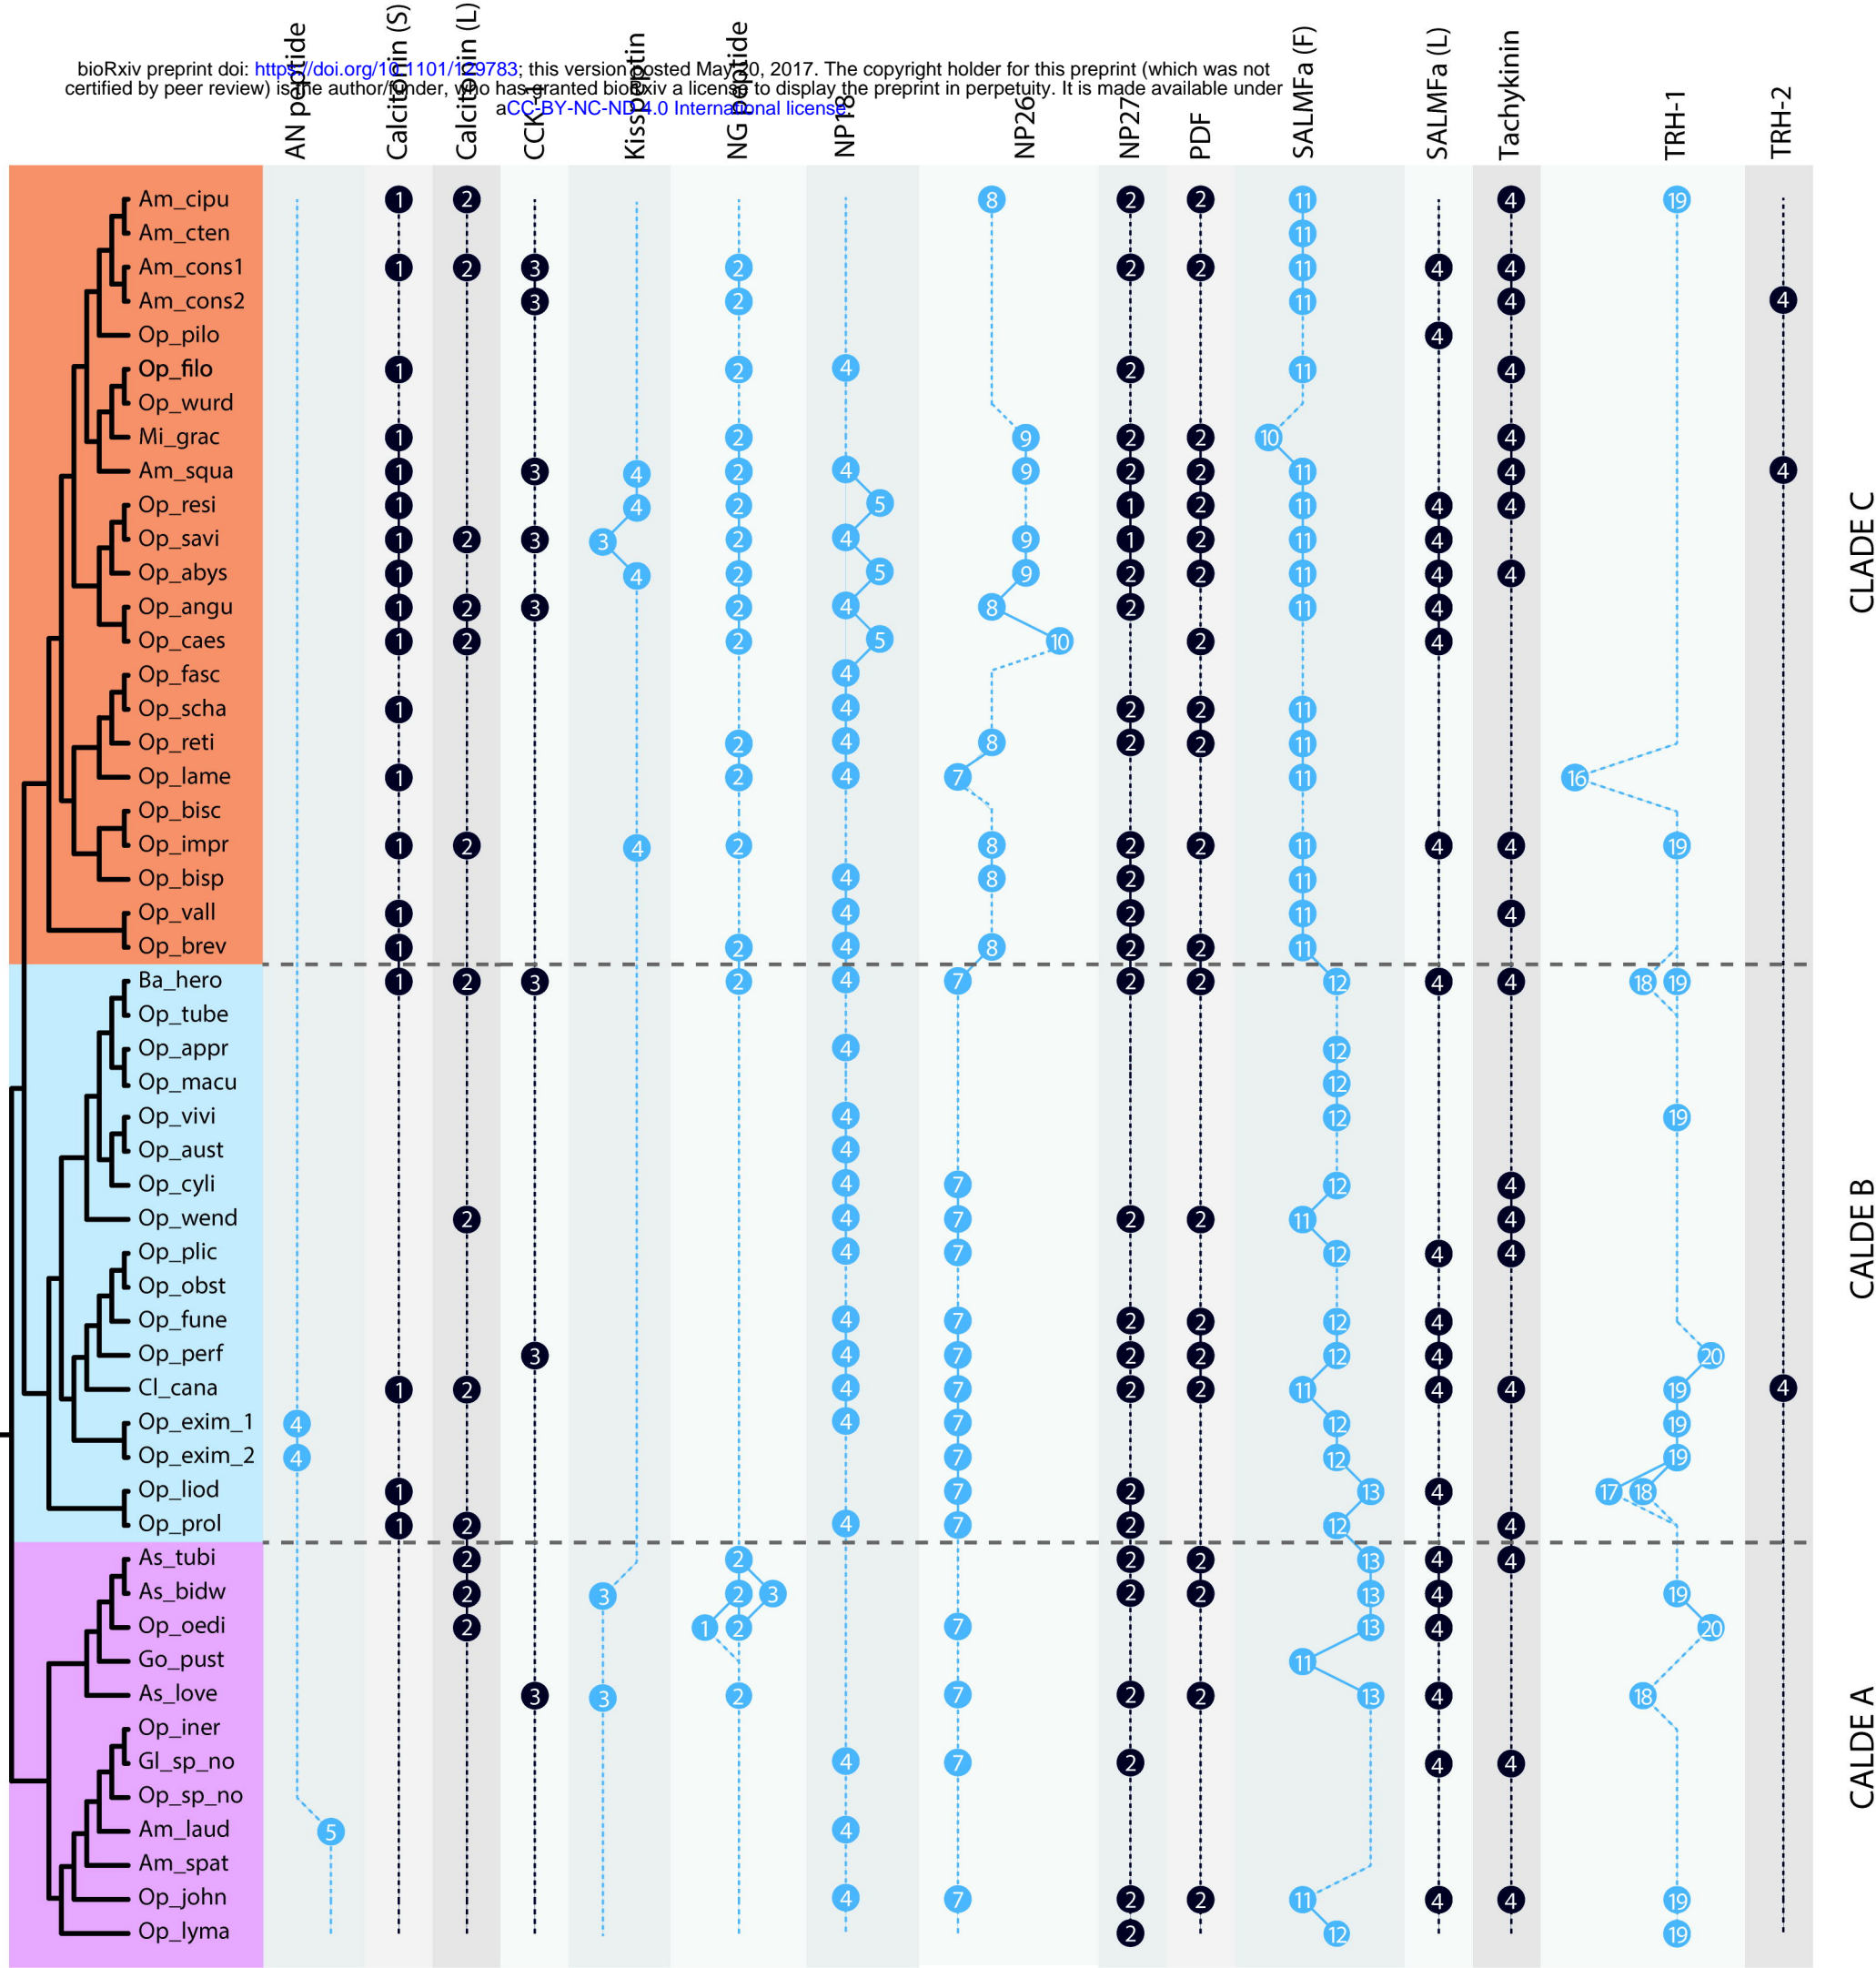

CLADE C

CALDE B

CALDE A

TRH-1

Am\_cipu SDDPSPDKRQFSACKRQFSAGKRQFSAGKRQFSAGKRQFSAGKRQWLGEEEE---YDPEE-----NLNMETRQFSACKRQFSAGKR---  
Op\_angu VDMPET---RQFSACKRQFSAGKRQFSAGKRQFSAGKRQFSAGKRQWVGGEEDDGLNDDMKRQFSAGKRQFSAGKRQFSAGKRQFSAGKR---  
Op\_lame VDMPET---RQFSACKRQFSAGKRQFSAGKRQFSAGKR-----QWVGGEPEE--WEDEDMKRQFSAGKRQFSAGKRQFSAGKRQFSAGKR---  
Op\_impr DDM-----KQFSACKRQFSAGKRQFSAGKRQFSAGKRQWVGGFPLE--FEDEDVKRQFSAGKRQFSAGKRQFSAGKRQFSAGKR---  
Ba\_hero\_a VDMPET---RQFSACKRQFSAGKRQFSAGKRQFSAGKR-----QWVGGEPE---VLNQDEKRQFSAGKRQFSAGKRQFSAGKRQFSAGKRQFS  
Ba\_hero\_b VDMPET---RQFSACKRQFSAGKRQFSAGKRQFSAGKR-----QWVGGEPE---VLNQDEKRQFSAGKRQFSAGKRQFSAGKRQFSAGKR---  
Op\_vivi VDMPET---RQFSACKRQFSAGKRQFSAGKRQFAACKR-----QWVGGEPE--FD-EAQKRQFSAGKRQFAACKRQYAAGKRQFTAGKR---  
Op\_perf VDMPET---RQFSACKRQFSAGKRQFSAGKRQFSAGKRQFSAGKRQWVGGEPE---DEEEEKRQFSAGKRQFSAGKRQFSAGKRQFSAGKR---  
Op\_exim\_1 VDMPET---RQFSACKRQFSAGKRQFSAGKRQFSAGKR-----QWVGQPDLDLDEEKRQFSAGKRQFSAGKRQFSAGKRQFSAGKR---  
Op\_liod\_a VDMPET---RQFSPGKRQFSAGKRQFSAGKRQFSAGKRQFSAGKRQWVGGESE--FEDEEKRQFSAGKRQFSAGKRQFSAGKRQFSAGKR---  
Op\_liod\_b VDMPET---RQFSPGKRQFSAGKRQFSAGKRQFSAGKR-----QWVGGESE--FEDEEKRQFSAGKRQFSAGKRQFSAGKRQFSAGKR---  
As\_bidw VDMPET---RQFSACKRQFSAGKRQFSAGKRQFSAGKR-----EWMDDGPDMLLEEDEKRQFSAGKRQFSAGKRQFSAGKRQFSAGKR---  
Op\_oedi VDMPET---RQFSACKRQFSAGKRQFSAGKRQFSAGKR-----EWMDDGPNM--LEEDEKRQFSAGKRQFSAGKRQFSAGKRQFSAGKR---  
As\_love VDMPET---RQFSACKRQFSAGKRQFSAGKRQFSAGKR-----EWM-DEPDM--LDEEDAKRQFSAGKRQFSAGKRQFSAGKRQFSAGKR---  
Op\_john VDMPQT---RQFSACKRQFSAGKRQFSAGKRQFSAGKR-----QWIGGAED--ENEAAKRQFSAGKRQFSAGKRQFSAGKRQFSAGKR---  
Op\_lyma VDIPQT---RQFSACKRQFSAGKRQFSAGKRQFSAGKR-----QWIGGEDD--ANEAAKRQFSAGKRQFSAGKRQFSAGKRQFSAGKR---

Am\_cipu ---RQFSAGKRQDWEELTPEEL--MDMFQAPETRQFSAGKRQFSAGKRQFSAGKR-----QWVGGE--EYDPEEMLNMATRQFSAGKR---  
Op\_angu ---RQFSAGKRQDWEETELTPEEF--MDMIPLPETRQFSAGKRQFSAGKRQFSAGKR-----QWVGGD--LEYEPEEDLDMETRQFSAGKRQFS  
Op\_lame ---RQFSAGKRQDWEDELTPEDL--MDILPAPETRQFSAGKRQFSAGKRQFSAGKR-----QWVGGE---YNPDDMLDMET-----  
Op\_impr ---RQFSAGKRQDWEELTPEEL--SDIVAAPETRQFSAGKRQFSAGKRQFSAGKR-----QWVGGM---ENPDDMLDMETRQFSAGKR---  
Ba\_hero\_a ACRQFSAGKRQDWEENLTPQDLLALDMLPLPETRQFSAGKRQFSAGKR-----QWVGGE--LEYDPNEMLDMETRQFSAGKR---  
Ba\_hero\_b ---RQFSAGKRQDWEENLTPQDLLALDMLPLPETRQFSAGKRQFSAGKR-----QWVGGE--LEYDPNEMLDMETRQFSAGKR---  
Op\_vivi ---RQFSAGKRQDWEELTPEELLLALDMLPVPETRQFSAGKRQFSAGKRQFSAGKR-----QWVGGD--LEYNPEEMLDMETRQFSAGKR---  
Op\_perf ---RQFSAGKRQDWEEDNLTPQDLLALGMLPIPETRQFSAGKRQFSAGKRQFSAGKR-----QWVGGE--QEYDPEDMLDMETRQFSAGKR---  
Op\_exim\_1 ---RQFSAGKRQDWEEDLTPQDLLALEMLPLPETRQFSAGKRQFSAGKRQFSAGKR-----QWVGGE--QEYNPEDMLDMETRQFSAGKR---  
Op\_liod\_a ---RQFSPGKREWNDLTPEDLLAMGLLPAPETRQFSAGKRQFSAGKRQFSAGKR-----QWVGGE--LEYNPDDMLEMEARQFSAGKR---  
Op\_liod\_b ---RQFSPGKREWNDLTPEDLLAMGLLPAPETRQFSAGKRQFSAGKRQFSAGKR-----QWVGGE--LEYNPDDMLEMEARQFSAGKR---  
As\_bidw ---RQFSAGKRQDWEQD-LTPEDYLAMEMLPAPETRQFSAGKRQFSAGKRQFSAGKRQFSAGKRQWVGGD---YDPEELLDMETRQFSAGKR---  
Op\_oedi ---RQFSAGKRQDWEQD-LTPEEYLAMEMLPAPETRQFSAGKRQFSAGKRQFSAGKRQFSAGKRQWVGGD---YDPEELLDMETRQFSAGKR---  
As\_love ---RQFSAGKRQDWEQD-LTPEEYLAMEMLPAPETRQFSAGKRQFSAGKRQFSAGKRQFSAGKRQWVGGE---YDPEELLNMEARQFSAGKR---  
Op\_john ---RQFSAGKRQDWEELTPEEYLAMEMLPAPETRQFSAGKRQFAACKRQFSAGKR-----QWIGGQEEQEYNPDDFLDMETRQFSAGKR---  
Op\_lyma ---RQFSAGKRQDWEQN-LNPEEYLAMEMLPAPETRQFSAGKRQFSAGKRQFSAGKR-----QWIGGDEGQEYNPDDFLDMATRQFSAGKR---

Am\_cipu ---RQFSAGKRQFSAGKRQWVGGE--AFLPEMDTRQFSAGKRQFSAGKRQFSAGKRQFSAGKR-----DDGETNILDEILEAEPDLAEE--E  
Op\_angu ACRQFSAGKRQFSAGKRQWVG---DVLPEMETRQFSAGKRQFSAGKRQFSAGKRQFSAGKR-----D-ADTDILDQILNADTTEE---E  
Op\_lame ---RQFSAGKRQFSAGKRQFSAGKR-----D--ETNILDEIL--DPAADDALAE  
Op\_impr ---RQFSAGKRQFSAGKRQWVGGMENPDDMLDMETRQFSAGKRQFSAGKRQFSAGKR-----D--ETNILDEILEADPAGEDALAE  
Ba\_hero\_a ---RQFSAGKRQFSAGKRQWVG---DVLPEMDTRQFSAGKRQFSAGKRQFSAGKR-----D--ETNILDEILEADPAENALSE  
Ba\_hero\_b ---RQFSAGKRQFSAGKRQWVG---DVLPEMDTRQFSAGKRQFSAGKRQFSAGKR-----D--ETNILDEILEADPAENALSE  
Op\_vivi ---RQFSAGKRQFSAGKRQWVG---DALPEMETRQFSAGKRQFSAGKRQFSAGKR-----D--ETDILDEILQAEPEAFSE  
Op\_perf ---RQFSAGKRQFSAGKRQWVG---DVLPEMDTRQFSAGKRQFSAGKRQFSAGKR-----D--ETNILDEILDAPAAANALSE  
Op\_exim\_1 ---RQFSAGKRQFSAGKRQWVG---DVLPEMDTRQFSAGKRQFSAGKRQFSAGKR-----D--VTNILEEILEAEPAAVDALSE  
Op\_liod\_a ---RQFSAGKRQFSAGKRQFSAGKR-----D--ETNILDEILEAEPAAENALSE  
Op\_liod\_b ---RQFSAGKRQFSAGKRQFSAGKR-----D--ETNILDEILEAEPAAENALSE  
As\_bidw ---RQFSAGKRQFSAGKRQWVG---EALPEMETRQFSAGKRQFSAGKRQFSAGKR-----D--ESNILHEILNAEPAAANSLSE  
Op\_oedi ---RQFSAGKRQFSAGKRQWVG---EALPEMETRQFSAGKRQFSAGKRQFSAGKR-----D--ETNILDEILDAPAAANSLSE  
As\_love ---RQFSAGKRQWIGG---EALPDMETRQFSAGKRQFSAGKRQFSAGKR-----D--ETNILDEILAEPAVANALSE  
Op\_john ---RQWIGG---DVIPDMETRQFSAGKRQFSAGKRQFSAGKRQFSAGKRQFAACKR-----DTNILDEFLEANPAENDALSE  
Op\_lyma ---RQFNPGKRQFSAGKRQWIGG---DAIPNMETRQFSAGKRQFSAGKRQFSAGKR-----D--ETNILDEILENDPAAENALSE

F-type SALMFa

Am\_cipu QLVRR-----SAQ--AKPVKLAGFAFKR--GQLVKRSSDDQLMEEDET--EKRGALDAAFTFKRR---DPSALSASFCKRRDPM--GLNALTFFCKR--GMN  
Op\_filo PLVRR-----SAQ--AKPVKLTGFQFQFKR--GQLEKRSADDKLMEEDET--EKRAALD-AFTFKRR---DPSGLTAFSFKRRDPL--GLNALTFFCKR--MS  
Mi\_grac PLVRR-----SAP--SKPVKLSGFIFFCKR--AQLEKRSADDKLMEEDET--EKRAAFD-AFTFKRR---DPSGLSAFSFKRRDPT--RLSALTFFCKR--GMS  
Am\_squa PLVRR-----SAQ--SKPVKLAGFAFKR--GQLEKRSADDKLMEEDET--EKRALSS-AFTFKRR---DPSGLSALTFFCKRRDPM--GLSALTFFCKR--GMN  
Op\_resi QLVRR-----SASSGAKPVKLAGFAFKRAGQLVKRSSDDQLVEEDGA--EKRAAMD-AFTFKRY---DPSGLSAFSFKRRDPL--GLSALTFFCKR--GMN  
Op\_abys SLVRR-----SASSGGSKPVKLAGFAFKR--GQLVKRSSDDQLLEEDST--EKRAAMD-AFTFKRM---SDPSGLSAFSFKRRDPM--GLSALTFFCKR--GMT  
Op\_angu QLVRR-----SAKSGGDKPVKLAGFAFKR--GQPVKRSSTNDELEEDGE---EKRAAMD-AFTFKRI---SDQE-LSPFSEFKRRDPM--GLSALTFFCKR--GMH  
Op\_scha QLVRR-----SAGSGSKPVKLAGFAFKR--GQLVKRSSDDQLLEEDEA---EKRAAMD-AFTFKRL--SKDPSALSASFCKRRDPM--GLSALTFFCKR--GMD  
Op\_lame QLVRR-----SAGAGSKPVKLAGFAFKR--GQLVKRSSDDQLLEEDEA---EKRASMD-AFTFKRL--SNDPSALSASFCKRRDPM--GLSALTFFCKR--GMN  
Op\_bisp QLVRR-----SAVAGSKPVKLAGFAFKR--GQLVKRSSDDQLLEEQDDA---EKRAAMD-AFTFKRP--SGDPTGLSAFSFKRRDPM--SLSALTFFCKR--GMD  
Op\_brev QLVRR-----SAGAGSKPVKLAGFAFKR--GQLVKRSSDDQLDEEQTT---EKRANLD-AFTFKRK--AGD--LSAFSFKRRDP--LSALTFFCKR--GMK  
Ba\_hero QLVRR-----SAGAGNKPVKLAGFAFKR--NQPVKRSDDRTEEEE---NKR GAMD-AFTFKRP--SGNPTGLSAFSFKRRREPVGSLSALTFFCKR--GMD  
Op\_appr QLVRR-----SAGAGSKPVKLAGFAFKR--NQPVKRSDDRADEEE---DKR GAMC-AFTFKRP--SGNPSGLSAFSFKRRREPLGSLSALTFFCKR--GTD  
Op\_vivi QPVRR-----SAGAGGKPVKLAGFAFKR--NPLVKRSDDKVEEQD---DKR GAMD-AFTFKRPSVSGDPSALSASFCKRRDPVGSLSALTFFCKR--A-N  
Op\_wend NLVRR-----SAGAGSKPVKLAGFAFKR--NQPVKRSDDQIEEEE---DKR GAMD-AFNFARP--SGDPSGLSAFSFKRRDPVGSLSALTFFCKR--AME  
Op\_plic QLVRR-----SA---KPVKLAGFQFQFKR--GQPVKRSDDQAHEEE---EKR GRMD-AFAPFKRL--SGDPSALSASFCKRRDPVSSLSALTFFCKR--GMD  
Op\_perf QLVRR-----SAG--SKPVKLAGFAFKR--GQPVKRSDDQLQEE---EKRGALD-AFAPFKRR--SGDPSGLSAFSFKRRDPASSLSALTFFCKR--GMD  
Cl\_cana QLVRR-----SAGAGSKPVKLAGFAFKR--GQPVKRSDDQAQEE---DKR GSM-D-AFTFKRL--SGGKSALSASFCKRRDPVGSLSALTFFCKR--GMD  
Op\_exim\_1 QLVRR-----SAGAGSKPVKLAGFAFKR--GQPVKRSDDQAQEE---DKR GSM-D-AFTFKRL--PGDPSALSASFCKRRDPVSSLSALTFFCKR--GMD  
Op\_liod QLVRRSAS--SGSKPKMSGFAFKR--SAGGSSKPVKLAGFAFKR--SQPVKRSDDQVEAQE---DKR GALD-AFHFKRL--SNDPSGLSAFSFKR--EPMGSLSGLTFFCKR--GMD  
Op\_prol QLVRR-----SAGAGSKPVKLAGFAFKR--GQPVKRSDDQA-EEE---DKR GALD-AFTFKRL--SSDP--LSAFNFKRRREPVSLSALTFFCKR--GMD  
As\_tubi PLVRRSAG--AGAS-KMSGFAFKR--SAG--GKPVKLAGFAFKR--SOLVKRSSDNVAENEE---EKR GAMD-AFTFKRL--SGDPSGLSTFSFKRRNPGTSLSALTFFCKR--GMY  
Op\_oedi PLVRRSAG--AGAS-KMSGFAFKR--SAG--GKPVKLAGFAFKR--SOLVKRSSDNVAENEE---EKR GAMD-AFTFKRL--SGDPSGLSTFSFKRRNPGTSLSALTFFCKR--GMY  
Go\_pust PLVRRSAKAAAGSA-KMSGFVFKR--SASAGSKPVKLAGFAFKR--SOLVKRSLDYEAENDE---EKR GAMN-AFTFKRL--SSDP-----AAVTFCKR--GMN  
As\_love QLVRRSAG--AGAA-KMSGFAFKR--SAGARSKPVKLAGFAFKR--SOLVKRSSDNEEENDE---EKR GARN-AFTFKRL--SGNPSALSASFCKRRPESALSALTFFCKR--GMN  
Op\_john QLVRR-----SAG--SKPTKLAGFAFKR--GQPVKRSDDNEAEDGQ---EKR GTMD-AFAPFKRP--SGDPTGLSAFSFKRRDPMSSLSALAFCKR--GMD  
Op\_lyma PLVRR-----SAGAGSKPVKLAGFAFKR--NPVKRSSDNEANDKE---EKRVPM-D-AFAPFKRP--SGDPTGLSAFSFKRRDPLSSLSALAFCKR--GMD

Am\_cipu PASGYSAFTFKRGRQMDNLHAFSFKR--GMDPSGLSAFSFKRGRDPSALSASFCKR-----MG-M-NAFTFKREGL--E-EDGAFE-EEND--EKRNQLSSLTGYTFCKR  
Op\_filo P-SGYSAFTFKRGRQMDNLHAFSFKR--GMDPSSLSALTFFCKRGRDPSLSASFCKR-----MG-M-NAFTFKRDEL--E-EDGAFE-DEND--EKRSRLSSLTGYTFCKR  
Mi\_grac P-SGYSAFTFKRGRMDNLNAFSFKR--GMDPSTLSAFSFKRGRDPSALSASFCKR-----MG-M-NAFTFKRDEL--E-EDGAFE-EEND--EKR-----SYSR  
Am\_squa P-SGYSAFTFKRGRMDNLNAFSFKR--GMDPSGLSAFSFKRGRDPSALSASFCKR-----MG---PAFTFKRDE---EDGAFE-EENY--EKRRIGALTYGTFCKR  
Op\_resi P-SGMSAFSFKR-RMEPLSAFSFKRGRGMDPSGLSAFSFKRGRDPSGLSAFSFKR-----MG-M-NAFTFKREGG--EEDPAFE-EENNN-EKRAGYNGLSQFTFGK  
Op\_abys P-SGMSAFSFKR-RMEPLSAFSFKRGRGMDPSGLSAFSFKRGRDPLGLNAFSFKR-----MG-M-NAFTFKREGL--EEDDALE-EEDNND-EKRAGYNGLSQFTFGK  
Op\_angu P-SSMSAFSFKR-RMDPLSAFSFKRAMDPAGLSAFSFKRGRDPSALSASFCKRGTGPS-GLSAFSFKR--MG-M-NAFTFKREGG--E-EETAFAKNTND--EKRAGYNGLSQFTFGK  
Op\_scha P-SGFSAFSFKR-R-EPYSAFSFKR--GMDPSALSASFCKRRARDPSALSASFCKR-----MGGMTNAFTFKREGL--EEDGAFE-EENQDEE-EKRGYNGIAGYTFCKR  
Op\_lame P-SGFSAFSFKR-R-EPLSAFSFKR--GMDPSALSASFCKRGRDPSALSASFCKR-----ANMGMTNAFTFKRDDL--EEDGAFE-EENQDEE-EKRGYNGISYTFCKR  
Op\_bisp P-SGFSAFSFKR-R-DPLSAFTFKR--GMDPSALSASFCKRGRDPSALSASFCKR-----MGGLTNAFTFKRDDA--EEDGAFE-EDNND--EKR-GFNGISYTFCKR  
Op\_brev P-SAFDAFSFKR-R-DPLSAFSFKR--GMDPNALGAFSFKRGRD-NALGAFSFKR-----GM-DAFTFKRDD--EEGAFE-DED---EKR-AYNPISAYTFCKR  
Ba\_hero P-AGFSAFNFKR-R-DPLSAFNFKR--GMDPSGLSAFSFKRGRDPSGLSAFSFKRGRDPSGLSAFSFKR--G-M-DAFTFKREDL--D-EEGAFE-DEND--EKR-GFNGISYTFCKR  
Op\_appr P-AGFSAFNFKR-R-DPLSAFNFKR--GMDATGLSAFSFKRGRDPSGLSAFSFKRGRDPSGLSAFSFKR--G-M-DAFAFKREDL--D-EDGAFE-DENED--EKR-GFNGISYTFCKR  
Op\_vivi P-SGFSAFNFKR-R-DPLTAFNFKR--AMDASGLSAFSFKRGRDPSGLSAFSFKRGRDPSGLSAFSFKR--G-M-DAFTFKREEL--D-DEGAFE-EENED--EKR-NFNGISYTFCKR  
Op\_wend P-AGFSAFSFKR-R-DPLGAFSFKR--GMDASGLSAFNFKRGRDATGLSAFSFKRGRDPSGLSAFSFKR--G-M-DAFAFKREDL--EEDGAFE-DEND--EKR-GYQGISYTLGK  
Op\_plic P-SGFSAFNFKR-R-DPLGAFSFKR--GMDASGLSAFNFKRGRDAAGLSAFSFKRGRDPSGLSAFSFKR--G-Y-DAFTFKREGL--D-EEGAFE--END--EKR--FNGISGLTFCKR  
Op\_perf P-SGFNAFNFKR-R-DPLSAFNFKR--GMDASGLSAFSFKRGRDPSGLSAFSFKRGRDPSGLSAFSFKR--G-F-DAFTFKREGL--DEGEAFL-DEND--EKR--FNGISGLTFCKR  
Cl\_cana P-SGFSAFNFKR-R-NPLSDFNLDK--GMDASGLSAFSFKRGRDATGLSAFSFKRGRDPSGLSAFSFKR--G-M-DAFTFKREGL--D-EEGAFE-EEND--EKR--FNGISYTFCKR  
Op\_exim\_1 P-SGFSAFNFKR-R-DPLSAFNFKR--GMDASGLSAFSFKRGRDPSGLSAFSFKRGRDPSGLSAFSFKR--G-M-DAFTFKREGL--D-EEGAFE-DEND--EKR--FNGISYTFCKR  
Op\_liod P-SGLGAFSFKR-R-DPLGAFNFKR--GMDASGLSAFSFKRGRDPSGLSAFSFKRGRDPSGLSAFSFKR--G-M-DAFTFKREDM--D-EEGAFE-DENED--EKR-AYNGISGLTFCKR  
Op\_prol P-SGFSAFSFKR-R-DPLSAFNFKR--GMDASGLSAFSFKRGRDPSGLSAFSFKRGRDPSGLSAFSFKR--G-M-DAFTFKREDM--D-EEGAFE-DENED--EKR-AYNGISGLTFCKR  
As\_tubi P-SGLSAFNFKR-R-DPLSTFSFKR--GVE-SGLSAFNFKRGRDPSGLSAFSFKR--MPTGSLSAFNFKR--G-M-NAFTFKREDL--D-EAAAFE-DENND--EKR-AFNGMSYTFCKR  
Op\_oedi P-SGLSAFNFKR-R-DPLSTFSFKR--GME-SGLSAFNFKRGRDPSGLSAFSFKR--MPTGSLSAFNFKR--G-M-NAFTFKREDL--D-EAAAFE-DENND--EKR-AFNGMSYTFCKR  
Go\_pust P-SGISAFNFKR-R-DPLSTFSFKR--GME-SGLSAFNFKRGRDPSGLSAFSFKR--MPTGSLSAFNFKR--G-M-NAFTFKRKYL--D-EEGAFD-DENND--EKR-AYNGMSYTFCKR  
As\_love P-SALSAFNFKR-R-DPLSAFSFKR--GMQ-SGLSAFNFKRGRDPSGLSAFSFKR--MPTGSLGFDPKR--G-M-DAFTFKREDL--D-EEGAFD-DENND--EKR-AFNGISYTFCKR  
Op\_john R-SGFNAFSFKR-R-DPLSAFSFKR--GMD--RLNAFNFKRGRDPSGLSAFSFKR--MPTGSLGFDPKR--G-M-DAFAFKRENL--D-EDGAFE-DED---EKR-AFDGLSAYAFCKR  
Op\_lyma P-SGFNAFSFKR-R-DPLSAFSFKR--GMD--GLNAFNFKRGRDPSALSASFCKRGRDPSALSASFCKR--G-M-DAFAFKREDL--D-EEGAFQ-DEND--EKR-AFNGLSGYAFCKR
